# Supplementary material for: ‘Surely you’re not still breastfeeding’: a qualitative exploration of women’s experiences of breastfeeding beyond infancy in the UK
Source: PubMed Central journal article supplement — BMJ Open. 2020 May 26;10(5):e035199. doi: 10.1136/bmjopen-2019-035199 (PMC7259861; doi:10.1136/bmjopen-2019-035199), 2020-05-26
Supplement: bmjopen-2019-035199.draft_revisions.pdf [file bmjopen-2019-035199.draft_revisions.pdf]

# BMJ Open

BMJ Open is committed to open peer review. As part of this commitment we make the peer review history of every article we publish publicly available.

When an article is published we post the peer reviewers' comments and the authors' responses online. We also post the versions of the paper that were used during peer review. These are the versions that the peer review comments apply to.

The versions of the paper that follow are the versions that were submitted during the peer review process. They are not the versions of record or the final published versions. They should not be cited or distributed as the published version of this manuscript.

BMJ Open is an open access journal and the full, final, typeset and author-corrected version of record of the manuscript is available on our site with no access controls, subscription charges or pay-per-view fees (<http://bmjopen.bmj.com>).

If you have any questions on BMJ Open's open peer review process please email [info.bmjopen@bmj.com](mailto:info.bmjopen@bmj.com)

# BMJ Open

## **“Surely you’re not still breastfeeding”: A qualitative exploration of women’s experiences of breastfeeding beyond infancy**

|                               |                                                                                                                                                                                                                                                                                               |
|-------------------------------|-----------------------------------------------------------------------------------------------------------------------------------------------------------------------------------------------------------------------------------------------------------------------------------------------|
| Journal:                      | <i>BMJ Open</i>                                                                                                                                                                                                                                                                               |
| Manuscript ID                 | bmjopen-2019-035199                                                                                                                                                                                                                                                                           |
| Article Type:                 | Original research                                                                                                                                                                                                                                                                             |
| Date Submitted by the Author: | 22-Oct-2019                                                                                                                                                                                                                                                                                   |
| Complete List of Authors:     | Thompson, Amy; University of Birmingham College of Medical and Dental Sciences<br>Topping, AE; University of Birmingham, Institute of Clinical Sciences; University Hospitals Birmingham NHS Foundation Trust<br>Jones, Laura; University of Birmingham, Institute of Applied Health Research |
| Keywords:                     | QUALITATIVE RESEARCH, PUBLIC HEALTH, Maternal medicine < OBSTETRICS                                                                                                                                                                                                                           |
|                               |                                                                                                                                                                                                                                                                                               |

SCHOLARONE™  
Manuscripts

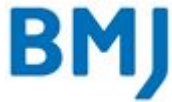

I, the Submitting Author has the right to grant and does grant on behalf of all authors of the Work (as defined in the below author licence), an exclusive licence and/or a non-exclusive licence for contributions from authors who are: i) UK Crown employees; ii) where BMJ has agreed a CC-BY licence shall apply, and/or iii) in accordance with the terms applicable for US Federal Government officers or employees acting as part of their official duties; on a worldwide, perpetual, irrevocable, royalty-free basis to BMJ Publishing Group Ltd ("BMJ") its licensees and where the relevant Journal is co-owned by BMJ to the co-owners of the Journal, to publish the Work in this journal and any other BMJ products and to exploit all rights, as set out in our [licence](#).

The Submitting Author accepts and understands that any supply made under these terms is made by BMJ to the Submitting Author unless you are acting as an employee on behalf of your employer or a postgraduate student of an affiliated institution which is paying any applicable article publishing charge ("APC") for Open Access articles. Where the Submitting Author wishes to make the Work available on an Open Access basis (and intends to pay the relevant APC), the terms of reuse of such Open Access shall be governed by a Creative Commons licence – details of these licences and which [Creative Commons](#) licence will apply to this Work are set out in our licence referred to above.

Other than as permitted in any relevant BMJ Author's Self Archiving Policies, I confirm this Work has not been accepted for publication elsewhere, is not being considered for publication elsewhere and does not duplicate material already published. I confirm all authors consent to publication of this Work and authorise the granting of this licence.

## TITLE PAGE

**“Surely you’re not *still* breastfeeding”:****A qualitative exploration of women’s experiences of breastfeeding beyond infancy**

Authors: Amy J Thompson<sup>a</sup>, Anne E Topping<sup>b,c</sup>, Laura L Jones<sup>d</sup>

Affiliations: <sup>a</sup>College of Medical and Dental Sciences, University of Birmingham, Birmingham, UK, <sup>b</sup>Institute of Clinical Sciences, University of Birmingham, Birmingham, UK, <sup>c</sup>University Hospitals Birmingham NHS Foundation Trust, Birmingham, UK, <sup>d</sup>Institute of Applied Health Research, University of Birmingham, Birmingham, UK

Email addresses: [AJT361@student.bham.ac.uk](mailto:AJT361@student.bham.ac.uk), [A.E.Topping@bham.ac.uk](mailto:A.E.Topping@bham.ac.uk),  
[L.L.Jones@bham.ac.uk](mailto:L.L.Jones@bham.ac.uk)

Corresponding author: Laura L Jones

Title: “Surely you’re not *still* breastfeeding”: A qualitative exploration of women’s experiences of breastfeeding beyond infancy

Abstract word count: 295

Article word count (excluding indented quotes): 4479

Number of figures: 2

Number of tables: 3

Number of additional files: 2

## ABSTRACT

**Objectives:** To explore women's experiences of breastfeeding beyond infancy (>1 year). Understanding these experiences, including the motivators, enablers and barriers faced, may help inform future strategies to support and facilitate mothers to breastfeed for an optimal duration.

**Design:** An exploratory qualitative study using an interpretive approach. Semi-structured interviews were conducted (in-person, or via phone or Skype), transcribed and thematically analysed using the Framework Method.

**Setting:** Participants drawn from across the United Kingdom through online breastfeeding support groups.

**Participants:** Maximum variation sample of women currently breastfeeding a child older than one year, or who had done so in the previous five years. Participants were included if over 18, able to speak English at conversational level and resident in the UK.

**Results:** The findings offer insights into the challenges faced by women breastfeeding older children, including perceived social and cultural barriers. Three core themes were interpreted: (1) Parenting philosophy; (2) Breastfeeding beliefs; (3) Transition from babyhood to toddlerhood. Women had not intended to breastfeed beyond infancy prior to delivery, but developed a 'child-led' approach to parenting and internalised strong beliefs that breastfeeding is the biological norm. Women perceived a negative shift in approval for continued breastfeeding as their child transitioned from 'baby' to 'toddler'. This compelled women to conceal breastfeeding and fostered a reluctance to seek advice from healthcare professionals. Mothers reported feeling pressured to breastfeed when their babies were young, but discouraged as children grew. They identified best with the term "natural-term breastfeeding".

**Conclusions:** This study suggests that providing antenatal education regarding biological weaning-ages and promotion of guidelines for optimum breastfeeding duration may encourage more women to breastfeed for longer. Promoting the concept of natural-term breastfeeding to mothers, and healthcare professionals, employers and the public is necessary to normalise and encourage acceptance of breastfeeding beyond infancy.

## KEYWORDS

Breastfeeding; Lactation; Social Stigma; Social Support; natural-term breastfeeding; Qualitative Research

## STRENGTHS AND LIMITATIONS OF THIS STUDY

- This interpretive, exploratory qualitative study contributes to the growing, but limited, literature on longer-term breastfeeding and identifies some potential practical solutions which may support women to breastfeed for an optimal duration.
- Due to the potentially sensitive nature of the topic, it can be difficult to identify and access breastfeeding women; however, this study used social media as a platform for recruitment, which allowed construction of a maximum variation sample, thereby increasing transferability.
- This study has a relatively large sample size with rich data, and analytic data saturation was achieved.
- Participants were predominantly white and highly educated, which could limit transferability, however, this may also reflect that this demographic is most likely to breastfeed past infancy.
- One of the authors has breastfed an older child, so a reflexive approach was important to mitigate the ways in which this may have inadvertently shaped data collection; a second analyst provided a different stance.

## MAIN TEXT

**INTRODUCTION**

The fundamental importance of breastfeeding to the health and development of children is well established (1). The Lancet Breastfeeding Series synthesises comprehensive evidence demonstrating that breastfeeding offers the best nutritional start for infants, conferring short-term benefits such as lower infectious morbidity and mortality, as well as life-long protection against obesity and diabetes mellitus (1, 2). Mothers who breastfeed also benefit from reduced risk of breast cancer, and potentially ovarian cancer and diabetes (1).

The World Health Organization (WHO) currently recommends that infants in all settings should be exclusively breastfed until six months of age, after which they should receive nutritious complementary foods alongside continued breastfeeding for two years or beyond (3). However, it is important to highlight that the WHO recommendation lacks clarity regarding the duration for which the benefits of breastfeeding are sustained beyond 24 months.

Significant efforts have been made to promote breastfeeding, often focused on educating new and expectant mothers regarding benefits of breastfeeding (4), which to some extent have been successful. The last national Infant Feeding Survey (IFS) was conducted in 2010, and the results showed that 81% of babies born in the UK were breastfed at birth (5). However, that proportion fell sharply: at six months postpartum, the proportion of mothers exclusively breastfeeding was around 1%, and only 25% of infants were still receiving any breastmilk (5). Breastfeeding status after six months was not recorded and so it is difficult to estimate breastfeeding rates beyond this (6). The IFS has now been discontinued, and data

1  
2  
3 relating to breastfeeding initiation in England is captured and reported by NHS Digital via  
4 the Maternity Services Data Set (MSDS), and breastfeeding status at 6-8 weeks through the  
5 Children and Young People's Health Services (CYPHS) Data Set (7). As such, more recent data  
6 on breastfeeding rates at six months is unavailable. However, in 2018 Scotland published  
7 the results of its Maternal and Infant Nutrition Survey, in which 43% of respondents  
8 reported providing breastmilk to their infants at six months (8), although no data were  
9 provided about exclusive breastfeeding at six months. These data suggest that more women  
10 are breastfeeding and for longer. It is therefore important to understand the experiences  
11 and needs of these mothers who continue breast feeding beyond six months.  
12  
13  
14  
15  
16  
17  
18  
19  
20  
21  
22  
23  
24  
25  
26  
27

28 A recent large meta-analysis determined that breastfeeding should continue until at least  
29 two years to achieve its full effect (1). Protection from infectious diseases has been shown  
30 to persist into at least the second year of life, and longer breastfeeding durations were  
31 associated with a higher Intelligence Quotient (IQ), and a lower risk of obesity in the long-  
32 term (1,2). Additionally, fostering optimal breastfeeding duration has economic advantages,  
33 both in terms of reducing healthcare expenditure through decreasing infant morbidity and  
34 mortality (9), and increasing children's educational potential and likely future earnings,  
35 while simultaneously promoting social equity (10).  
36  
37  
38  
39  
40  
41  
42  
43  
44  
45  
46  
47  
48  
49

50 Almost all women are biologically able to breastfeed, except for those with a (very) few  
51 limiting medical disorders (11). Whilst initiation rates are high (5), most women discontinue  
52 much earlier than recommendations advise. It has been suggested that once breastfeeding  
53 has been established, one of the main factors influencing breastfeeding duration is the  
54 social environment in which breastfeeding occurs (12), with a wide range of social, cultural  
55  
56  
57  
58  
59  
60



1  
2  
3 and market factors shaping decision to continue, or persist (13). Research has found that  
4  
5 worries about breastfeeding in public are prevalent (14), and negative reactions from  
6  
7 others, and the feelings invoked by those reactions, contribute to decisions about how long  
8  
9 to breastfeed (15). Previous qualitative research with breastfeeding mothers has found that  
10  
11 many receive persistent, unsolicited advice about the need to wean and are encouraged to  
12  
13 discontinue from nursing “too long” (4). Breastfeeding behaviours are, it seems, open to  
14  
15 public evaluation, commented upon and criticised by family, friends, and strangers (16),  
16  
17 resulting in stigma and social sanctioning (4,17). Whilst a substantial body of qualitative  
18  
19 research exists examining women’s breastfeeding experiences there are relatively fewer  
20  
21 studies that have explored experiences of breastfeeding beyond six months (18). The small  
22  
23 number of more recent studies have found that women nursing older children feel highly  
24  
25 scrutinized (19), frequently face negative attitudes and criticism from others (18-21), and  
26  
27 experience marginalization (19).  
28  
29  
30  
31  
32  
33  
34  
35  
36  
37  
38  
39  
40  
41  
42  
43  
44  
45  
46  
47  
48  
49  
50  
51  
52  
53  
54  
55  
56

Building on this limited literature, this interpretive qualitative study aims to focus explicitly  
on women’s experiences of breastfeeding beyond infancy (> 1 year of age). Understanding  
women’s experiences, including the motivators, enablers and barriers faced, may help  
inform future strategies to support and facilitate mothers to breastfeed for an optimal or  
‘natural-term’ duration. Throughout the paper, the term “weaning” is used to describe the  
process of stopping breastfeeding and is distinct from the process of introducing  
supplementary foods.

## **METHODS**

### **AIM**

1  
2  
3 To explore women's experiences of breastfeeding beyond one year of age including: beliefs  
4 and motivations regarding breastfeeding beyond infancy; perceptions of support;  
5  
6 perceptions of enablers, facilitators and barriers to continued breastfeeding, and the  
7  
8 influence of these factors on feeding decisions.  
9  
10  
11  
12  
13  
14

## 15 DESIGN AND SETTING

16  
17 This exploratory, interpretive qualitative study was deemed the most appropriate design to  
18 explore decision-making processes, beliefs and experiences (23), and particularly well-suited  
19 to researching breastfeeding experiences (24). The study is reported using COREQ guidelines  
20 (22) (see Additional File 2). Semi-structured interviews were chosen to better elicit accounts  
21 that provided a deep understanding of women's perceptions and their impact upon their  
22 behaviour (25). They were favoured over a group data collection approach in order to allow  
23 individual narratives to be explored. Interviews were conducted face to face, or via phone or  
24 Skype, depending on participant preference and location.  
25  
26  
27  
28  
29  
30  
31  
32  
33  
34  
35  
36  
37  
38  
39

## 40 PARTICIPANTS

41 Participants were women aged at least 18 years currently breastfeeding a child older than  
42 one year, or who had done so in the previous five years. Participants were included if able  
43 to speak English at conversational level and willing and able to provide informed consent.  
44  
45 Given that the social and cultural climate in which breastfeeding occurs has been shown to  
46 influence women's experiences (12), only women resident in the UK who had breastfed for  
47 an extended period were eligible to participate.  
48  
49  
50  
51  
52  
53  
54  
55  
56  
57  
58  
59

## 60 SAMPLING AND RECRUITMENT

1  
2  
3 A purposive sample using a maximum variation sampling frame (26) including: age; number  
4  
5 of children, and longest duration breastfeeding one child was employed. Recruitment  
6  
7 adverts were posted through online Facebook breastfeeding support groups. Potential  
8  
9 participants were invited to complete an online screening survey, which assessed eligibility  
10  
11 and collected data on selected sampling variables to facilitate sample construction. 191  
12  
13 women completed the survey, all of which were eligible. Based on sampling frame variables  
14  
15 highlighted above, 30 women were contacted via email with further detailed study  
16  
17 information: 27 were willing to take part; three did not respond. Data collection continued  
18  
19 to be scheduled until analytic saturation was achieved, defined as the point when no further  
20  
21 themes or concepts were surfaced from further interviews. Nineteen interviews contributed  
22  
23 to the final dataset from across the UK. Women who were not interviewed were politely  
24  
25 informed by email that data was no longer being actively collected. A flowchart of this  
26  
27 process is shown in Figure 1.  
28  
29  
30  
31  
32  
33  
34  
35  
36

### 37 DATA COLLECTION

38  
39 Prior to interview, all participants provided informed consent. In the case of telephone or  
40  
41 Skype interviews, this was completed electronically. Participants were requested to  
42  
43 complete a short demographic questionnaire to facilitate description of the sample (shown  
44  
45 in Table 3). Interviews were conducted by AJT (female, medical student, two children). A  
46  
47 topic guide was developed, informed by the existing literature on breastfeeding  
48  
49 determinants (see Table 1), and used flexibly as a framework for the semi-structured  
50  
51 interviews. Analysis occurred concurrently with data collection, allowing iterative updating  
52  
53 of the topic guide and coding frame. Open questions were used to facilitate extended  
54  
55 answers, and probes to extract further detail. Interviews were conducted either face-to-face  
56  
57  
58  
59  
60

(n=6), via telephone (n=8), or via Skype (n=5), and lasted an average of 45 minutes (range: 28 to 77 minutes). Face-to-face interviews were conducted in the participants' own homes at mutually agreed times. Participants' children or other family members could be present, at participants' discretion. Interviews were digitally audio-recorded with consent, and brief field notes made to aid reflection. All participants were offered a £10 shopping voucher upon interview completion.

Table 1. Sample of discussion guide prompts

| <b>Sample prompts for discussion</b>                                                                       |
|------------------------------------------------------------------------------------------------------------|
| When you were pregnant with your first baby, what were your thoughts on breastfeeding?                     |
| Can you tell me your thoughts on weaning? How did you/do you plan to manage the process?                   |
| Why have you chosen/did you choose to continue breastfeeding your child?                                   |
| How do you feel about nursing in public? Has this changed over time and how?                               |
| Can you tell me about support you have had for continuing to breastfeed?                                   |
| Are you part of any breastfeeding support groups? Why did you join, and what do you get from these groups? |
| Has anything ever made you consider stopping breastfeeding?                                                |

## ANALYSIS

Audio-recordings were transcribed verbatim and anonymised, removing any personal identifying information. Transcripts were read repeatedly to enable familiarisation and immersion. Interview transcripts were coded inductively by one of the authors (AJT), facilitated by NVivo version 11 software, and analysed thematically, guided by the Framework Method (see Table 2) (27). Initial codes and themes were discussed and agreed

by two authors (AJT and LLJ), before developing an analytical framework into which subsequent transcripts were charted. Charting produced a highly organised matrix of summarised data, which allowed data to be compared and contrasted whilst retaining the wider context of each case, thereby encouraging thick description. The analytical framework was finalised after extensive discussion between authors.

Table 2. Analysis process (27)

| <b>Summary of Framework Approach Analysis Procedure</b> |                                                                                                                                                                                                                                                                                                                  |
|---------------------------------------------------------|------------------------------------------------------------------------------------------------------------------------------------------------------------------------------------------------------------------------------------------------------------------------------------------------------------------|
| Stage 1:<br>Transcription                               | Audio recordings are used to produce a verbatim transcription of the interview. Since the content is what is of primary interest, clean verbatim transcriptions are sufficient. The transcription process is a good opportunity to begin immersion in the data.                                                  |
| Stage 2:<br>Familiarisation                             | Familiarisation with whole interviews using audio-recordings and/or transcripts and any field notes is a vital stage in interpretation. Any initial analytical notes, thoughts or impressions are recorded.                                                                                                      |
| Stage 3:<br>Coding                                      | Transcripts are read line-by-line, and a label ('code') is applied to each passage which summarises the important messages from that section. Because this study was inductive in nature, an open coding framework was applied i.e. coding anything potentially relevant rather than applying pre-defined codes. |
| Stage 4:<br>Development of analytical framework         | When some initial transcripts have been coded, the researcher decides on a set of codes which will then be applied to all subsequent transcripts. Codes can be grouped together into categories or themes.                                                                                                       |
| Stage 5:<br>Application of analytical framework         | The working analytical framework is applied to all subsequent transcripts, and is iteratively updated as new codes emerge. In this study NVivo software was used to facilitate this stage.                                                                                                                       |

|                                                       |                                                                                                                                                                                                                                                                                                                                                                   |
|-------------------------------------------------------|-------------------------------------------------------------------------------------------------------------------------------------------------------------------------------------------------------------------------------------------------------------------------------------------------------------------------------------------------------------------|
| Stage 6:<br>Charting data<br>into framework<br>matrix | A matrix is generated using a spreadsheet, and the data from each transcript are 'charted' into the matrix. Data is summarised by category from each transcript, in a way which reduces the volume of data while still retaining the original meanings and sentiments of the participant. Interesting or illustrative quotations are also included in the matrix. |
| Step 7:<br>Interpretation                             | Gradually, characteristics of the data are identified, and theories or models explaining the narrative can be developed.                                                                                                                                                                                                                                          |

## RESULTS

19 interviews contributed to the final dataset. Table 3 contains a summary of participants' demographic characteristics.

Table 3: Participant characteristics table

| ID  | Age (years) | Number of Children | Duration breast-feeding(years) | Currently breast-feeding? | Marital status | Employment status    | Highest level of education | Ethnicity     |
|-----|-------------|--------------------|--------------------------------|---------------------------|----------------|----------------------|----------------------------|---------------|
| P1  | 40-49       | 1                  | 3-4                            | Yes                       | Married        | Employed – Part-time | Postgraduate               | White British |
| P2  | 30-39       | 1                  | 1-2                            | Yes                       | Married        | Employed – Part-time | Postgraduate               | White British |
| P3  | 30-39       | 2                  | 2-3                            | No                        | Married        | Employed – Full-time | Postgraduate               | White British |
| P4  | 30-39       | 2                  | 3-4                            | Yes                       | Married        | Student              | Postgraduate               | White British |
| P5  | 30-39       | 2                  | 2-3                            | No                        | Married        | Self-employed        | Postgraduate               | White British |
| P6  | 40-49       | 2                  | 5-6                            | Yes                       | Married        | Employed – Full-time | Postgraduate               | White British |
| P7  | 40-49       | 4                  | 5-6                            | Yes                       | Married        | Homemaker            | Bachelor's degree          | White Other   |
| P8  | 30-39       | 1                  | 1-2                            | Yes                       | Married        | Employed – Full-time | Postgraduate               | White Other   |
| P9  | 40-49       | 1                  | 7-8                            | Yes                       | Single         | Self-employed        | Bachelor's degree          | White British |
| P10 | 20-29       | 2                  | 3-4                            | Yes                       | Married        | Employed – Full-time | Bachelor's degree          | White British |
| P11 | 30-39       | 1                  | 3-4                            | Yes                       | Co-habiting    | Employed – Full-time | Bachelor's degree          | White British |
| P12 | 20-29       | 1                  | 1-2                            | Yes                       | Co-            | Employed –           | Bachelor's                 | White         |

|     |       |   |     |     |             |                      |                   |               |
|-----|-------|---|-----|-----|-------------|----------------------|-------------------|---------------|
|     |       |   |     |     | habiting    | Full-time            | degree            | British       |
| P13 | 30-39 | 3 | 3-4 | Yes | Married     | Homemaker            | Bachelor's degree | White British |
| P14 | 30-39 | 1 | 3-4 | Yes | Co-habiting | Employed – Part-time | A-Level           | White British |
| P15 | 30-39 | 4 | 4-5 | Yes | Married     | Self-employed        | Postgraduate      | White British |
| P16 | 30-39 | 2 | 3-4 | Yes | Married     | Homemaker            | Postgraduate      | White British |
| P17 | 20-29 | 2 | 5-6 | Yes | Single      | Homemaker            | GCSE              | White British |
| P18 | 30-39 | 1 | 2-3 | Yes | Married     | Employed – Full-time | Postgraduate      | Asian British |
| P19 | 30-39 | 1 | 1-2 | Yes | Married     | Employed – Part-time | Bachelor's degree | White British |

Three core themes were interpreted within the dataset: (1) Parenting philosophy; (2) Breastfeeding beliefs; (3) Transition from babyhood to toddlerhood (Figure 2). Exemplar quotations are embedded in the text, and further quotes are available in Additional File 1.

## 1 PARENTING PHILOSOPHY

### 1.1 Attachment Parenting Paradigm

Women's parenting styles and choices fell under the theme labelled attachment parenting paradigm (see Discussion for more explanation of this term), and women described their approach as "gentle parenting" (P14) which they felt contributed to their successful breastfeeding relationships. Some women identified themselves as "attachment parents" (P16), while others were unfamiliar with the term but described parenting practices consistent with the philosophy. All women breastfed their children on demand during infancy, all but two regularly co-slept with their children, and all felt it was important to rapidly respond to infant crying: "I've not been one to leave my child crying on their own. Children cry, that's fine, if they're with somebody." (P11). Most women had not intended to

1  
2  
3 be 'attachment parents' prior to delivery, but instead adopted the approach after the child  
4 was born through an instinctive desire to respond to their child's cues and subsequently  
5  
6 learned more about the philosophy. Forming a secure attachment with children was  
7  
8 identified as being important. Continuing to breastfeed they felt promoted child security  
9  
10 and confidence:  
11  
12

13  
14  
15 "…because they [child] have that closeness with you, security of breastfeeding,  
16  
17 they're generally much more comfortable and settled when they're away from you.  
18  
19 And we've never had an issue with him going to someone else, he'll quite happily go  
20  
21 and play or go and be in a classroom." (P1)  
22  
23  
24  
25  
26  
27

28 Women felt their chosen parenting style was different but gave their child the self-  
29  
30 assurance to be more independent. Participants felt there was a culture of forcing babies to  
31  
32 be overly independent at a young age, "the majority of people still cry it out" (P14). They  
33  
34 described parents were under social pressure to conform to certain behaviours, such as  
35  
36 sleep training. As this mother describes:  
37  
38

39  
40 "There were so many things that I felt I had to stop, like I had to stop sleeping with  
41  
42 the baby, they have to go to their cot, you have to sleep train them." (P14).  
43  
44

45 Women felt that societal attitudes surrounding infant sleep were particularly unhelpful for  
46  
47 breastfeeding mothers, and could damage nursing relationships:  
48

49  
50 "Health visitors telling you to sleep train your baby that's breastfed because they wake  
51  
52 up to feed at night time. It's quite normal for a breastfed child to wake to feed at night."  
53  
54 (P10)  
55  
56  
57  
58  
59  
60



1  
2  
3 “That’s also something that you see in the press and the national health  
4  
5 recommendations ‘don’t co-sleep, don’t bedshare’. I think they put the wrong slant on  
6  
7 it, because it’s such an important part of a successful breastfeeding relationship.” (P2)  
8  
9

10  
11  
12  
13 The women were aware of the link between co-sleeping and SIDS (see Discussion), but most  
14  
15 felt that the perceived benefits of co-sleeping outweighed the risk narrative from other  
16  
17 sources.  
18  
19

## 20 21 22 23 **1.2 Child-led Approach**

24  
25 In all aspects of parenting, women emphasized the importance of following the child’s cues  
26  
27 and allowing the child to do things at their own pace: “I’m very much about letting him do  
28  
29 things when he’s ready” (P9). For most participants, this philosophy also extended to  
30  
31 weaning. Women explained that they continued to breastfeed because their child was not  
32  
33 yet ready to stop: “I would have quite happily have stopped two years ago but he’s kind of  
34  
35 led it, and I’ve just let him really” (P6). Women generally felt that allowing their child to self-  
36  
37 wean was more important than continuing to breastfeed for a specified length of time:  
38  
39

40  
41  
42 “No one gives you a medal for breastfeeding, but I feel like I’ll get one if I can  
43  
44 complete his breastfeeding journey on his terms...I feel like I’ll give myself one for  
45  
46 it.” (P10)  
47  
48  
49  
50  
51

## 52 **2 BREASTFEEDING BELIEFS**

### 53 54 **2.1 Benefits of Breastfeeding**

55  
56  
57 All the women strongly believed that breastfeeding had been, and continued to be,  
58  
59 beneficial for their children in terms of nutrition and bonding. Health benefits were cited as  
60

1  
2  
3 the most important, including improved long-term health outcomes, and avoidance of  
4  
5 short-term illnesses: “Although he got ill when he was a toddler, I do believe his illnesses  
6  
7 were shorter and probably less frequent.” (P6). Participants also explained that when their  
8  
9 children were ill they would often continue nursing even if they refused other foods and  
10  
11 liquids, and were reassured that this would provide hydration and antibodies:  
12  
13

14  
15 “When he is sick he can have my milk and I don’t have to worry quite so much about  
16  
17 whether he’s hydrated and I know that he’ll probably get better faster.” (P7)  
18  
19  
20  
21  
22

## 23 **2.2 Biological Norm**

24  
25 A narrative repeatedly expressed was the strong belief that continued breastfeeding is the  
26  
27 biological norm: “For me the biggest thing is that it’s biologically normal. And it’s a normal  
28  
29 thing to do. Other cultures see it as normal.” (P5). Women believed that by adhering to the  
30  
31 practices to which our ancestors were adapted would allow children to achieve their  
32  
33 biological potential. Most participants discussed human biological weaning-ages as a  
34  
35 justification: “It’s the biological norm for us as organisms...they naturally wean when they  
36  
37 lose their milk teeth and their jaw shape changes so they can’t latch.” (P11). Participants  
38  
39 also cited traditional societies who continue to breastfeed their child beyond infancy:  
40  
41  
42  
43

44 “I’ve read about other societies that children will feed until they get their back  
45  
46 molars when they’re about 6 or 7” (P4).  
47  
48  
49  
50  
51

52 Women identified best with the term ‘natural-term breastfeeding’, explaining that  
53  
54 breastfeeding beyond infancy is an aspect of biological heritage. All participants expressed  
55  
56 dislike of the term ‘extended breastfeeding’ because “it makes it sound not-normal” (P18),  
57  
58  
59  
60

1  
2  
3 and believed that the practice was perceived as 'extended' due to culturally-imposed  
4  
5 expectations:

6  
7  
8 "I believe in natural-term breastfeeding. It's important that people know it's not  
9  
10 extended, it's normal!" (P13)  
11  
12

### 13 14 15 **2.3 Sense of Achievement** 16

17 All participants expressed pride in their breastfeeding and believed it was an important  
18 achievement. Paradoxically, successful breastfeeding engendered pride for participants  
19 while they simultaneously expressed the belief that breastfeeding was normal and natural.  
20 The women rationalized this inconsistency by describing breastfeeding as challenging and  
21 therefore that success demonstrated commitment. Some women expressed feelings of  
22 failure and guilt due to difficulties conceiving or traumatic births, but felt a sense of  
23 redemption having successfully breastfed:  
24  
25  
26  
27  
28  
29  
30  
31  
32  
33

34  
35 "For me breastfeeding has been healing. I didn't give birth in the way that I wanted  
36  
37 to so being able to breastfeed has been a gift. It will be one of my greatest  
38  
39 achievements" (P9)  
40  
41  
42  
43  
44

45 "I think that because I couldn't conceive them [naturally], I couldn't give birth to him  
46  
47 naturally...I think it made me more determined to [breast] feed. It was the one thing  
48  
49 I could do." (P6)  
50  
51  
52  
53

### 54 55 **2.4 Supporting Others** 56

57 All the women expressed a desire to support other breastfeeding mothers. Many  
58  
59 acknowledged having experienced challenges in their own breastfeeding journeys, and felt  
60

1  
2  
3 they would not have succeeded without support. Most participants reported that “there’s a  
4 real lack of quality support” (P1), and worried that women are sometimes encouraged to  
5  
6 give-up breastfeeding rather than supported to continue. Support was considered  
7  
8 particularly important given that many people have mothers and grandmothers who did not  
9  
10 breastfeed so: “There’s not the natural support that we would traditionally have had in the  
11  
12 family” (P11).  
13  
14  
15  
16  
17  
18  
19

20 Additionally, participants found that conversations around breastfeeding were often a “very  
21  
22 difficult discussion” (P1) with new or expectant mothers because their desire to support  
23  
24 women could be perceived as pressure or criticism: “It’s hard to say without sounding like  
25  
26 I’m attacking people who do things differently.” (P13). Although the women felt proud of  
27  
28 their own breastfeeding achievements and wanted to share their experiences, they  
29  
30 described concern that expressing this could be perceived by others as conceited.  
31  
32  
33  
34  
35  
36

### 37 3 TRANSITION FROM BABYHOOD TO TODDLERHOOD

#### 38 3.1 Adjusting Expectations

39  
40 All of the women had planned to initiate breastfeeding, but had not intended to breastfeed  
41  
42 beyond one year at the time of their first pregnancy. Instead, participants re-adjusted their  
43  
44 breastfeeding intentions as children grew. Many of the women reported that they had not  
45  
46 been aware of the recommendations regarding breastfeeding duration antenatally, and had  
47  
48 been unaware it was possible to continue to feed an older child:  
49  
50  
51  
52  
53

54 “I think it’s very ingrained in our society that kids don’t breastfeed: Babies wean  
55  
56 onto solids and that’s the end of it. That’s what I thought happened. I didn’t realise it  
57  
58 [lactation] carried on.” (P12)  
59  
60

1  
2  
3 Moreover, prior to having children, many women felt that breastfeeding an older child was  
4  
5 “weird” (P1) or “crazy” (P13), and as such had to overcome their own prejudices as their  
6  
7 children grew and continued to breastfeed.  
8  
9

10  
11  
12 All women had breastfed on demand when their infants were very young, but began to  
13  
14 introduce boundaries as their babies became toddlers. The reasons for introducing  
15  
16 boundaries varied, but were commonly cited as practical reasons such as encouraging  
17  
18 children to sleep for longer stretches, and to avoid the need for nursing outside the home.  
19  
20 The women felt it was important that the child could understand these boundaries and  
21  
22 therefore rationalise and negotiate to agree mutually acceptable restrictions. Some women  
23  
24 night-weaned their children, while others would limit the number or length of feeds. This  
25  
26 negotiation process was important in allowing mothers to continue nursing, because  
27  
28 continued breastfeeding without restrictions became tiring and impractical:  
29  
30  
31  
32  
33

34  
35 “He has that little bit more understanding... We now have a limit that there’s a time in  
36  
37 the evening by which he needs to have milk because I find the later it gets the more  
38  
39 uncomfortable. I’m tired, I get fed up, so he’s respecting that.” (P9)  
40  
41  
42  
43  
44

### 45 **3.2 Managing Perceived Disapproval**

46  
47 Women described how perceived approval for breastfeeding changed as their child  
48  
49 transitioned from ‘baby’ to ‘toddler’. Participants felt pressured to breastfeed when their  
50  
51 babies were young, but discouraged as their child grew. Women were criticized for  
52  
53 continuing to nurse and were openly questioned by family and co-workers about weaning  
54  
55 intentions. The age at which they became aware of this sea change in attitudes varied, but  
56  
57 was typically between one and two years. The child’s chronological age was a factor in this  
58  
59  
60

1  
2  
3 attitudinal shift, the child's physical size and developmental abilities were also influential.  
4  
5  
6 Milestones perceived as significant in transitioning to 'toddler' were walking and the child  
7  
8 being "able to ask for it [breastmilk]" (P11). Participants described being made to feel like an  
9  
10 "outcast" (P14) or "outsider" (P17). Although the women felt judged, perceived disapproval  
11  
12 was not sufficient to motivate weaning for most women. When asked whether anything had  
13  
14 ever made them consider stopping breastfeeding, one participant explained she had  
15  
16  
17 struggled to cope with persistent criticism from co-workers:

20 "I feel very under the microscope since I've come back to work. I've had comments  
21  
22 like 'well you're still feeding her, what do you expect? She's still using you as a  
23  
24 dummy.'" (P19)  
25  
26

27  
28 The women perceived that their decision to breastfeed was not considered private by family  
29  
30 members or co-workers, and found their choices being discussed publicly.  
31  
32  
33

### 35 **3.2.1. Self-protection strategies**

36  
37 In response to expressions of disapproval, women developed various self-protection  
38  
39 strategies. Some women were open about their ongoing nursing but felt the need to have  
40  
41 "scientific research to back it up" (P11) so they could "leap up and defend" (P5) their  
42  
43 decisions. Several women felt protected by the WHO recommendation of breastfeeding for  
44  
45 two years. However, most women concealed the fact they were breastfeeding an older  
46  
47 child. Participants who had previously felt confident to breastfeed in public began to avoid  
48  
49 feeding outside of the home:  
50  
51  
52

54 "I would never feed him in public. I probably didn't feed him in public much after he  
55  
56 was two." (P6)  
57  
58  
59  
60

1  
2  
3 “When I picked her up from nursery she would always want a feed and I didn’t just  
4  
5 feed her there, I would go and hide somewhere...I didn’t even tell the nursery staff I  
6  
7 was still breastfeeding” (P16)  
8  
9

10  
11  
12  
13 Women avoided conversations about nursing and would “keep it quiet” (P12) or lead others  
14  
15 to believe their children were weaned:  
16

17  
18 “You reach a point where other people assume that the child has weaned and there  
19  
20 is no reason to correct that assumption...it’s just easier for both parties” (P7)  
21  
22  
23  
24

### 25 **3.2.2. Accessing support**

26  
27 Peer support groups were important for participants to feel “accepted” (P2) and women  
28  
29 were comforted “knowing that other people are doing it” (P10). Many women attended in-  
30  
31 person support groups, but online groups became increasingly important as children aged.  
32  
33 Peer advice was often sought as many women felt unable to seek professional support for  
34  
35 fear of disapproval. Participants reported that healthcare professionals (HCPs) advised  
36  
37 weaning as a solution to problems: “They’re like ‘can’t they just stop?’” (P10), and several  
38  
39 participants reported being offended by comments made by doctors. One participant was  
40  
41 asked: “Surely you’re not *still* breastfeeding? Are you going to do that until she goes to  
42  
43 university?” (P16), and another told that continuing to breastfeed would be detrimental to  
44  
45 her child:  
46  
47  
48  
49

50  
51  
52 “The consultant made some comments about how I should be considering weaning  
53  
54 and not feeding my baby anymore because of her age... he told me there were no  
55  
56 benefits to breastfeeding beyond two, and he told me that breastfeeding hinders  
57  
58 children’s development.” (P5)  
59  
60

1  
2  
3 Women perceived that many HCPs were not aware of the benefits of breastfeeding and  
4  
5 often anticipated negative responses; they therefore did not trust advice if the provider was  
6  
7 perceived as unsupportive.  
8  
9

10  
11  
12  
13 Participants reported that they developed personal concerns during subsequent  
14  
15 pregnancies, including uncertainty about whether nursing during pregnancy is safe, and  
16  
17 questions regarding the possibility or practicalities of tandem nursing more than one child.  
18  
19 Women sought advice on these topics from peer groups, as there was concern that  
20  
21 professionals may have insufficient knowledge to provide support, or offer advice coloured  
22  
23 by “opinion rather than evidence” (P5).  
24  
25  
26  
27  
28  
29

### 30 **3.3 Breastfeeding as a parenting tool**

31  
32 When children became toddlers, women described using breastfeeding as a practical  
33  
34 “parenting tool” (P2). Participants explained that breastfeeding was an effective way to  
35  
36 calm and “reset” (P1) toddlers, and was useful to “control their behaviour” (P6). Women  
37  
38 would offer breastmilk as a “modified cuddle” (P4) if children hurt themselves or became  
39  
40 frightened:  
41  
42  
43

44  
45 “If he does get really upset about something and he can’t calm down usually he can  
46  
47 settle with having a little bit of milk. So for me it’s like this cure all – it’s so  
48  
49 wonderful; I rely on it quite a lot.” (P7)  
50  
51  
52  
53

54  
55 One participant explained that breastfeeding had helped her child cope with a hospital  
56  
57 admission:  
58  
59  
60



1  
2  
3                   “...they had to put a cannula in. I had him facing me while his arm was out, and I  
4  
5                   nursed him through that because it was so very distressing.” (P9)  
6  
7  
8  
9

10                   Many participants also found breastfeeding a useful tool to manage night-waking, and was  
11  
12                   described as an “easy way to get them back to sleep” (P12).  
13  
14  
15

## 16 17 18 **DISCUSSION**

19  
20                   This study explored the experiences of 19 women who breastfed their child beyond one  
21  
22                   year of age and contributes to the limited, but growing, literature exploring experiences of  
23  
24                   longer-term breastfeeding. Women in this study actively expressed dislike for the term  
25  
26                   “extended breastfeeding”, which is the label often used to describe the practice of  
27  
28                   breastfeeding beyond infancy in the academic literature (28) and by HCPs; they identified  
29  
30                   best with the term “natural-term breastfeeding”. Women reported feeling pressured to  
31  
32                   breastfeed when their babies were young, but equally felt pressured to discontinue as  
33  
34                   children grew. Most participants were unaware of WHO guidelines for duration of  
35  
36                   breastfeeding and thought breastfeeding an older child was ‘weird’ prior to delivery.  
37  
38                   Women described having to overcome their own prejudices towards breastfeeding older  
39  
40                   children, and perceived that doing so was considered socially deviant. It was perceived by  
41  
42                   the women that most HCPs disapprove of breastfeeding beyond infancy, which fostered  
43  
44                   reluctance to seek advice and support.  
45  
46  
47  
48  
49  
50

51  
52  
53  
54                   Strengths of this study include its relatively large sample size with rich data, and that  
55  
56                   analytic data saturation was achieved. Due to the potentially sensitive nature of  
57  
58                   breastfeeding beyond infancy, women are often difficult to identify and access (28). Many  
59  
60

1  
2  
3 previous studies have recruited via advocacy groups (6,17,29,30); however, these women  
4  
5 may be considerably more open about their breastfeeding status and findings may not be  
6  
7 transferable to breastfeeding mothers in general. This study used social media as a platform  
8  
9 for recruitment, which allowed construction of a maximum variation sample including  
10  
11 women of a range of ages, with different numbers of children, and a wide range of  
12  
13 breastfeeding duration, thereby increasing transferability. Limitations of the study include  
14  
15 that participants were predominantly white and highly educated, however, this may also  
16  
17 reflect that this demographic is most likely to breastfeed past infancy (28). As in all  
18  
19 qualitative research, researcher position and reflexivity were important considerations. The  
20  
21 interviewer (AJT) is a mother of two who has breastfed an older child herself, and therefore  
22  
23 it was important to adopt a reflexive approach (31) to mitigate the ways in which this may  
24  
25 have inadvertently shaped data collection. The 'insider' (32) position of the interviewer may  
26  
27 have been advantageous as participants can be more willing to share their experiences with  
28  
29 someone who they perceive to be understanding of their situation (32). In addition, the  
30  
31 researcher was equipped with insights to understand implied content, and hence potentially  
32  
33 elicit a deeper understanding of the phenomenon (32). An inductive approach to analysis  
34  
35 was adopted to ensure that interpreted themes were rooted in the data (33), with a second  
36  
37 analyst (LLJ) providing a different stance during interpretation as this researcher had not  
38  
39 breastfed beyond infancy.  
40  
41  
42  
43  
44  
45  
46  
47  
48  
49  
50  
51

52 In line with other studies (19,20,34,35) the decision to continue breastfeeding beyond  
53  
54 infancy was shaped by parenting philosophy, and women reported childcare practices  
55  
56 consistent with the attachment parenting paradigm. However, this study found that the  
57  
58 adoption of this strategy was gradual, and not necessarily held prior to delivery. The  
59  
60

1  
2  
3 adoption of it occurs as the breastfeeding mother learns to parent, and instinctually follows  
4  
5 the cues of her infant, ultimately leading to the re-alignment of parenting beliefs and re-  
6  
7 interpretation of health advice. The philosophy holds such importance that the women  
8  
9 ultimately adopt subversive and secretive behaviour to continue breastfeeding, which they  
10  
11 perceive as necessary to optimally nurture the child. Further, this study found that the  
12  
13 philosophy evolved as children grew. Initially it was entirely 'child-led', but as children  
14  
15 became able to rationalise and negotiate the women introduced boundaries. This  
16  
17 negotiation was important for women to continue, as breastfeeding without boundaries  
18  
19 became arduous or impractical. Attachment parenting has its roots in Attachment Theory  
20  
21 (36), which posits that a strong emotional and physical connection to at least one primary  
22  
23 caregiver is critical to development. The term "attachment parenting" describes a style of  
24  
25 parenting which is highly responsive to infant cues (37), and typical behaviours include co-  
26  
27 sleeping, feeding on demand, extensive carrying and holding of infants, and rapid response  
28  
29 to crying (38). Research suggests that this parenting style is associated with enhanced brain  
30  
31 and social development, including peer relationships and schooling, and in the longer term  
32  
33 more favorable responses to stress (38).  
34  
35  
36  
37  
38  
39  
40  
41  
42  
43  
44

45 Co-sleeping was believed to be important in establishing a successful nursing relationship,  
46  
47 however, co-sleeping and night-feeding are not aligned with contemporary western cultural  
48  
49 expectations (28) which value prolonged periods of independent sleep (39). For women who  
50  
51 wish to co-sleep, the provision of safe co-sleeping advice may help facilitate establishment  
52  
53 and maintenance of successful breastfeeding. It is important to note that there is an  
54  
55 association between co-sleeping and sudden infant death syndrome (SIDS)(40,41). The  
56  
57 National Institute of Clinical Excellence (NICE) recommends that parents should be informed  
58  
59  
60

1  
2  
3 of this association, but the guidance also states the causes of SIDS are likely to be multi-  
4  
5 factorial and a possible causality link with co-sleeping is not clearly established (41).  
6  
7  
8  
9

10 One motivator for breastfeeding beyond infancy which was repeatedly discussed was a  
11  
12 strong belief in breastfeeding as a biological norm. This echoes prior studies on longer-term  
13  
14 breastfeeding, in which mothers narrated their decisions to continue breastfeeding as  
15  
16 “natural” (34) and “evolutionarily appropriate” (19). From an evolutionary perspective,  
17  
18 modern human children are adapted to be breastfed for several years (42,43).  
19  
20  
21

22 Anthropological research estimates that the human biological weaning-age falls between  
23  
24 two and seven-and-a-half years of age, if based on physiological parameters alone (42).  
25  
26

27 Providing education on biological weaning-ages could contribute to normalisation of this  
28  
29 behaviour and motivate more women to breastfeed for longer.  
30  
31  
32

33  
34  
35 Women perceived that breastfeeding an older child was considered socially deviant, and  
36  
37 experienced open comments and criticism, mirroring the findings of previous research (6,  
38  
39 17-21, 34). Women also perceived that most HCPs disapprove of, or are uneducated about,  
40  
41 breastfeeding beyond infancy, which fostered reluctance to seek advice and support from  
42  
43 professionals. Although UK child health records contain documentation to facilitate  
44  
45 conversations regarding infant feeding, the last section which formally documents a  
46  
47 discussion about breastfeeding occurs during the 9-12-month developmental review. Given  
48  
49 that women were hesitant to actively seek support, inclusion of a discussion around  
50  
51 breastfeeding at the two-year-review may promote normalcy and afford women a ‘safe’  
52  
53 opportunity to discuss any issues with a HCP. It may also be prudent for midwives to discuss  
54  
55 breastfeeding with multiparous women early during subsequent pregnancies, as women  
56  
57  
58  
59  
60

1  
2  
3 reported that becoming pregnant again prompted breastfeeding concerns. Assessing the  
4  
5 views and knowledge of HCPs about this is an important area for future research, to  
6  
7  
8 establish whether additional training or guidance is needed.  
9

## 10 11 12 **CONCLUSION**

13  
14  
15 Enabling optimal breastfeeding duration has potentially enormous health, social and  
16  
17 economic advantages (1,2,9). Women experience cultural and social barriers to  
18  
19 breastfeeding their children beyond infancy, which may compel women to conceal the  
20  
21 behaviour. Moreover, women are reluctant to seek support from HCPs due to fear of  
22  
23 judgement or pressure to wean. HCPs should be aware of the benefits of optimal duration  
24  
25 breastfeeding, and be mindful of their terminology when consulting with women, for  
26  
27 example, using language such as “natural-term breastfeeding” rather than “extended  
28  
29 breastfeeding”. Inclusion of a breastfeeding section, to facilitate formal documentation, at  
30  
31 the two-year-review may promote normalcy and afford women a ‘safe’ window of  
32  
33 opportunity to discuss potential issues. Education regarding biological weaning-ages and  
34  
35 promotion of WHO guidelines for minimum breastfeeding duration may encourage more  
36  
37 women to breastfeed for longer. As well as promoting natural-term breastfeeding to  
38  
39 mothers, education targeting the public and HCPs is necessary to encourage normalisation  
40  
41 and acceptance.  
42  
43  
44  
45  
46  
47  
48  
49  
50  
51

## 52 **LIST OF ABBREVIATIONS**

53  
54 CYPHS: Children and Young People’s Health Services

55  
56 HCP: Healthcare professional

57  
58 IFS: Infant Feeding Survey  
59  
60

1  
2  
3 MSDS: Maternity Services Data Set  
4

5 NICE: National Institute of Clinical Excellence  
6

7  
8 NHS: National Health Service  
9

10 SIDS: Sudden Infant Death Syndrome  
11

12  
13 WHO: World Health Organisation  
14  
15  
16  
17

## 18 **DECLARATIONS**

19  
20 **Ethics approval and consent to participate:** Ethical approval was sought and a favourable  
21  
22 decision obtained from the University of Birmingham Internal Ethics Review Committee (ref:  
23  
24 IREC2017/1319061). All participants provided informed consent prior to participation.  
25  
26

27 **Consent for publication:** Not applicable.  
28  
29

30 **Availability of data and material:** The datasets generated and analysed during the current  
31  
32 study are not publicly available due to the risk of compromising the individual privacy of  
33  
34 participants, but are available from the corresponding author on reasonable request.  
35  
36

37 **Competing interests:** The authors declare that they have no competing interests.  
38  
39

40 **Funding:** This research received no specific grant from any funding agency in the public,  
41  
42 commercial or not-for-profit sectors.  
43  
44

45 **Patient and public involvement:** There were no funds or time allocated for PPI so we were  
46  
47 unable to involve patients. We have invited patients to help us develop our dissemination  
48  
49 strategy.  
50  
51

52 **Author contributions:** AJT conceived the study and designed it in collaboration with LLJ. AJT  
53  
54 conducted and transcribed the interviews. Data were coded by AJT. All authors contributed  
55  
56 to analysis and interpretation. Initial drafts of the manuscript were written by AJT, which  
57  
58  
59  
60

1  
2  
3 were reviewed and edited by LLJ and AET. All authors have read and approved the final  
4  
5 manuscript.  
6  
7

8 **Acknowledgements:** The authors express gratitude to the administrators of the social  
9  
10 media groups who kindly allowed recruitment adverts to be posted on their sites. We also  
11  
12 thank the women who took part for their time and candour, without whom this study would  
13  
14 not have been possible.  
15  
16  
17  
18  
19

## 20 **FIGURE TITLES**

21  
22  
23 Figure 1. Flowchart summary of recruitment and sampling process  
24

25 Figure 2. Schematic representation of themes  
26  
27  
28  
29

## 30 **ADDITIONAL FILES**

### 31 32 - **Additional file 1**

33  
34 Word document file (.docx)

35  
36 Title: Supplementary Quotes Table

37  
38 Description: Provides additional quotations to support themes  
39

### 40 41 - **Additional file 2**

42  
43 Word document file (.docx)

44  
45 Title: COREQ Checklist

46  
47 Description: Reports page numbers for each COREQ reporting criteria  
48  
49  
50  
51  
52  
53

## 54 **REFERENCES**

55  
56  
57  
58  
59  
60

- 1  
2  
3 (1) Victora CG, Bahl R, Barros AJD, Giovanny VA, Horton S, et al. Breastfeeding in the  
4  
5 21st century: epidemiology, mechanisms, and lifelong effect. *Lancet*.  
6  
7 2016;387:475-90.  
8  
9
- 10 (2) Rollins NC, Bhandari N, Hajeebhoy N, Horton S, Lutter CK, et al. Why invest, and  
11  
12 what it will take to improve breastfeeding practices? *Lancet*. 2016;387:491-501.  
13  
14
- 15 (3) World Health Organisation. Breastfeeding.  
16  
17 <https://www.who.int/topics/breastfeeding/en/>. Accessed 10 Jan 2019 .  
18  
19
- 20 (4) Stearns CA. Cautionary Tales About Extended Breastfeeding and Weaning. *Health*  
21  
22 *Care Women Int*. 2011;32(6):538–54.  
23  
24
- 25 (5) McAndrew F, Thompson J, Fellows L, Large A, Speed M, Rendrew M. Infant  
26  
27 Feeding Survey 2010. 2012.  
28  
29 [http://doc.ukdataservice.ac.uk/doc/7281/mrdoc/pdf/7281\\_ifs-uk-](http://doc.ukdataservice.ac.uk/doc/7281/mrdoc/pdf/7281_ifs-uk-2010_report.pdf)  
30  
31 [2010\\_report.pdf](http://doc.ukdataservice.ac.uk/doc/7281/mrdoc/pdf/7281_ifs-uk-2010_report.pdf). Accessed 10 Jan 2019.  
32  
33
- 34 (6) Dowling S, Pontin D. Using liminality to understand mothers' experiences of long-  
35  
36 term breastfeeding: 'Betwixt and between', and 'matter out of place.' *Health*.  
37  
38 2015;21(1):57–75.  
39  
40
- 41 (7) NHS England. Maternity and Breastfeeding Statistics.  
42  
43 [https://www.england.nhs.uk/statistics/statistical-work-areas/maternity-and-](https://www.england.nhs.uk/statistics/statistical-work-areas/maternity-and-breastfeeding/)  
44  
45 [breastfeeding/](https://www.england.nhs.uk/statistics/statistical-work-areas/maternity-and-breastfeeding/). Accessed 10 Jan 2019.  
46  
47
- 48 (8) Scottish Maternal and Infant Nutrition Survey 2017. 2018.  
49  
50 [https://www.gov.scot/binaries/content/documents/govscot/publications/statisti](https://www.gov.scot/binaries/content/documents/govscot/publications/statistics-publication/2018/02/scottish-maternal-infant-nutrition-survey-2017/documents/00531610-pdf/00531610-pdf/govscot%3Adocument)  
51  
52 [cs-publication/2018/02/scottish-maternal-infant-nutrition-survey-](https://www.gov.scot/binaries/content/documents/govscot/publications/statistics-publication/2018/02/scottish-maternal-infant-nutrition-survey-2017/documents/00531610-pdf/00531610-pdf/govscot%3Adocument)  
53  
54 [2017/documents/00531610-pdf/00531610-pdf/govscot%3Adocument](https://www.gov.scot/binaries/content/documents/govscot/publications/statistics-publication/2018/02/scottish-maternal-infant-nutrition-survey-2017/documents/00531610-pdf/00531610-pdf/govscot%3Adocument). Accessed  
55  
56  
57  
58  
59 10 Jan 2019.  
60



- 1  
2  
3  
4  
5  
6  
7  
8  
9  
10  
11  
12  
13  
14  
15  
16  
17  
18  
19  
20  
21  
22  
23  
24  
25  
26  
27  
28  
29  
30  
31  
32  
33  
34  
35  
36  
37  
38  
39  
40  
41  
42  
43  
44  
45  
46  
47  
48  
49  
50  
51  
52  
53  
54  
55  
56  
57  
58  
59  
60
- (9) Pokhrel S, Quigley MA, Fox-Rushby J, McCormick F, Williams A, Trueman P, et al. Potential economic impacts from improving breastfeeding rates in the UK. *Arch Dis Child*. 2014;100:430-7.
- (10) Hansen K. Breastfeeding: a smart investment in people and in economies. *Lancet*. 2016;387:416.
- (11) World Health Organization. Acceptable medical reasons for use of breast-milk substitutes. 2009.  
[http://apps.who.int/iris/bitstream/handle/10665/69938/WHO\\_FCH\\_CAH\\_09.01\\_eng.pdf?ua=1](http://apps.who.int/iris/bitstream/handle/10665/69938/WHO_FCH_CAH_09.01_eng.pdf?ua=1). Accessed 10 Jan 2019.
- (12) Kukla R. Ethics and Ideology in Breastfeeding Advocacy Campaigns. *Hypatia*. 2009;21(1):157–80.
- (13) Cattaneo A. Academy of Breastfeeding Medicine Founder’s Lecutue 2011: Inequalities and Inequities in Breastfeeding: An International Perspective. *Breastfeed Med*. 2012;7(1):3-9.
- (14) Sheeshka J, Potter B, Norrie E, Valaitis R, Adams G, Kuczynski L. Women’s Experiences Breastfeeding in Public Places. *J Hum Lact*. 2001;17(1):31–8.
- (15) Boyer K. The emotional resonances of breastfeeding in public: The role of strangers in breastfeeding practice. *Emot Sp Soc*. 2018;26:33–40.
- (16) Hauck Y, Irurita V. Incompatible expepectations: The dilemma of breastfeeding mothers. *Health Care Women Int*. 2003;24(1):62–78.
- (17) Buckley KM. Beliefs and Practices Related to Extended Breastfeeding among La Leche League Mothers. *J Perinat Educ*. 1992;1(2):45–53.

- 1  
2  
3 (18) Dowling S, Brown A. An Exploration of the Experiences of Mothers Who  
4 Breastfeed Long-Term: What Are the Issues and Why Does It Matter? *Breastfeed*  
5 *Med.* 2012;8(1):45–52.  
6  
7  
8  
9  
10 (19) Faircloth CR. ‘If they want to risk the health and well-being of their child, that’s  
11 up to them’: Long-term breastfeeding, risk and maternal identity. *Health Risk*  
12 *Soc.* 2010;12(4):357–67.  
13  
14  
15 (20) Faircloth C. ‘What Science Says is Best’: Parenting Practices, Scientific Authority  
16 and Maternal Identity. *Sociol Res Online.* 2010;15(4):1–14.  
17  
18  
19 (21) Newman KL, Williamson IR. Why aren’t you stopping now?! Exploring accounts  
20 of white women breastfeeding beyond six months in the East of England.  
21 *Appetite.* 2018;129:228–35.  
22  
23  
24 (22) Tong A, Sainsbury P, Craig J. Consolidated criteria for reporting qualitative  
25 research (COREQ): a 32-item checklist for interviews and focus groups. *Int J Qual*  
26 *Heal Care.* 2007;19(6):349–57.  
27  
28  
29 (23) Britten N, Jones R, Murphy E, Stacy R. Qualitative research methods in general  
30 practice and primary care. *Fam Pract.* 1995;12(1):104–14.  
31  
32  
33 (24) Leeming D, Marshall J, Locke A. Understanding process and context in  
34 breastfeeding support interventions: The potential of Qualitative Research.  
35 *Matern Child Nutr.* 2017;13(4):e12407.  
36  
37  
38 (25) DiCicco-Bloom C, Crabtree BF. The qualitative research interview. *Med Educ.*  
39 2006;40(4):314–21.  
40  
41  
42 (26) Patton M. *Qualitative Research and evaluation methods.* London: Sage  
43 Publications; 2004.  
44  
45  
46  
47  
48  
49  
50  
51  
52  
53  
54  
55  
56  
57  
58  
59  
60

- 1  
2  
3 (27) Gale NK, Heath G, Cameron E, Rashid S, Redwood S. Using the framework  
4 method for the analysis of qualitative data in multi-disciplinary health research.  
5  
6 BMC Med Res Methodol. 2013;13(1):117.  
7  
8  
9  
10 (28) Brockway M, Venturato L. Breastfeeding beyond infancy: a concept analysis. J  
11  
12 Adv Nurs. 2016;72(9):2003–15.  
13  
14  
15 (29) Kendall-Tackett KA, Sugarman M. The Social Consequences of Long-Term  
16  
17 Breastfeeding. J Hum Lact. 1995;11(3):179–83.  
18  
19  
20 (30) Gribble KD. Long-term breastfeeding; changing attitudes and overcoming  
21  
22 challenges. Breastfeeding Rev. 2008;16(1):5-15.  
23  
24  
25 (31) Berger R. Now I see it, now I don't: researcher's position and reflexivity in  
26  
27 qualitative research. Qual Res. 2013;15(2):219–34.  
28  
29  
30 (32) Drake P. Grasping at methodological understanding: a cautionary tale from  
31  
32 insider research. Int J Res Method Educ. 2010;33(1):85–99.  
33  
34  
35 (33) Pope C, Ziebland S, Mays N. Analysing qualitative data. BMJ.  
36  
37 2000;320(7227):114–6.  
38  
39  
40 (34) Faircloth C. 'Natural' Breastfeeding in Comparative Perspective: Feminism,  
41  
42 Morality, and Adaptive Accountability. Ethnos. 2017;82(1):19–43.  
43  
44  
45 (35) Faircloth C. "Culture means nothing to me": Thoughts on nature/culture in  
46  
47 narratives of long-term breastfeeding. Cambridge Anthropol. 2008;28(2):63–84.  
48  
49  
50 (36) Bowlby J. Attachment. London: Pelican; 1969.  
51  
52  
53 (37) Sears W, Sears M. The Attachment Parenting Book. Massachusetts: Little, Brown  
54  
55 and Company; 2001.  
56  
57  
58 (38) Miller PM, Commons M. The benefits of attachment parenting for infants and  
59  
60 children: A behavioural developmental view. Behav Dev Bull. 2010;16(1):1-14.

- 1  
2  
3 (39) van den Berg M, Ball HL. Practices, advice and support regarding prolonged  
4 breastfeeding: a descriptive study from Sri Lanka. *J Reprod Infant Psychol.*  
5  
6 2008;26(3):229–43.  
7  
8  
9  
10 (40) Hauck FR, Thompson JMD, Tanabe KO, Moon RY, Vennemann MM. Breastfeeding  
11 and Reduced Risk of Sudden Infant Death Syndrome: A Meta-analysis. *Pediatrics.*  
12  
13 2011;128(1):103-10.  
14  
15  
16  
17 (41) National Institute of Clinical Excellence (NICE). Addendum to Clinical Guideline  
18 37, Postnatal Care December. 2014.  
19  
20  
21  
22 [https://www.nice.org.uk/guidance/cg37/evidence/cg37-postnatal-care-full-](https://www.nice.org.uk/guidance/cg37/evidence/cg37-postnatal-care-full-guideline-addendum2)  
23 [guideline-addendum2](https://www.nice.org.uk/guidance/cg37/evidence/cg37-postnatal-care-full-guideline-addendum2). Accessed 9 Sept 2019.  
24  
25  
26  
27 (42) Dettwyler KA. A Time to Wean: The Hominid Blueprint for the Natural Age of  
28 Weaning in Modern Human Populations. In Stuart-Macadam P, Dettwyler KA.  
29 *Breastfeeding: Biocultural Perspectives*. New York: Aldine de Gruyter; 1995. p.  
30 39-73.  
31  
32  
33  
34  
35  
36  
37 (43) Dettwyler KA. When to Wean: Biological Versus Cultural Perspectives. *Clin Obstet*  
38 *Gynecol.* 2004;47(3).  
39  
40  
41  
42  
43  
44  
45  
46  
47  
48  
49  
50  
51  
52  
53  
54  
55  
56  
57  
58  
59  
60

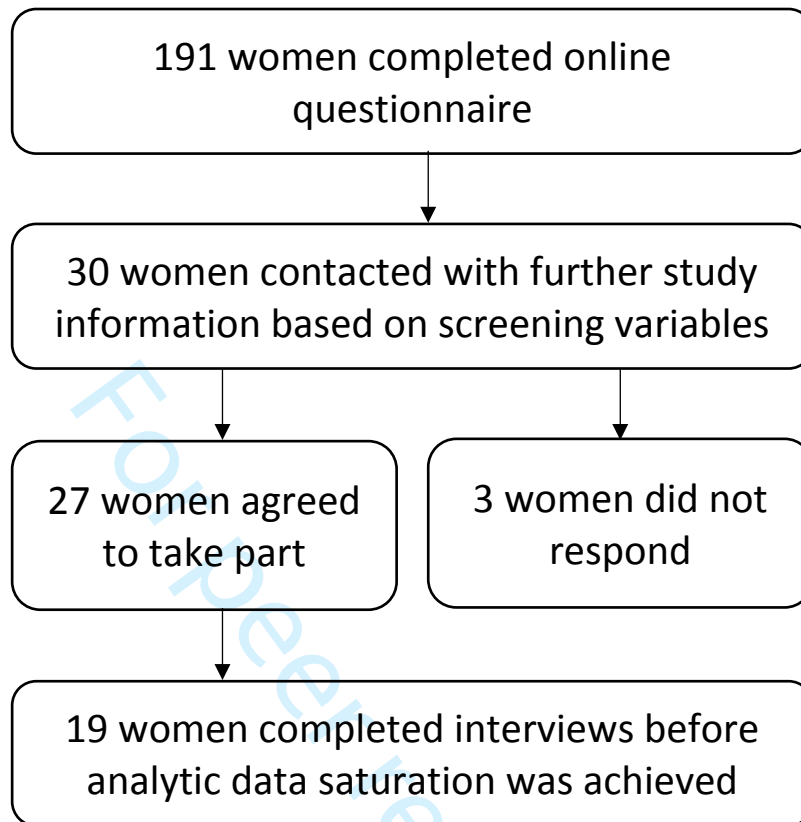

1  
2  
3  
4  
5  
6  
7  
8  
9  
10  
11  
12  
13  
14  
15  
16  
17  
18  
19  
20  
21  
22  
23  
24  
25  
26  
27  
28  
29  
30  
31  
32  
33  
34  
35  
36  
37  
38  
39  
40  
41  
42  
43  
44  
45  
46  
47  
48  
49  
50  
51  
52  
53  
54  
55  
56  
57  
58  
59  
60

For peer review only

1  
2  
3  
4  
5  
6  
7  
8  
9  
10  
11  
12  
13  
14  
15  
16  
17  
18  
19  
20  
21  
22  
23  
24  
25  
26  
27  
28  
29  
30  
31  
32  
33  
34  
35  
36  
37  
38  
39  
40  
41  
42  
43  
44  
45  
46  
47  
48  
49  
50  
51  
52  
53  
54  
55  
56  
57  
58  
59  
60

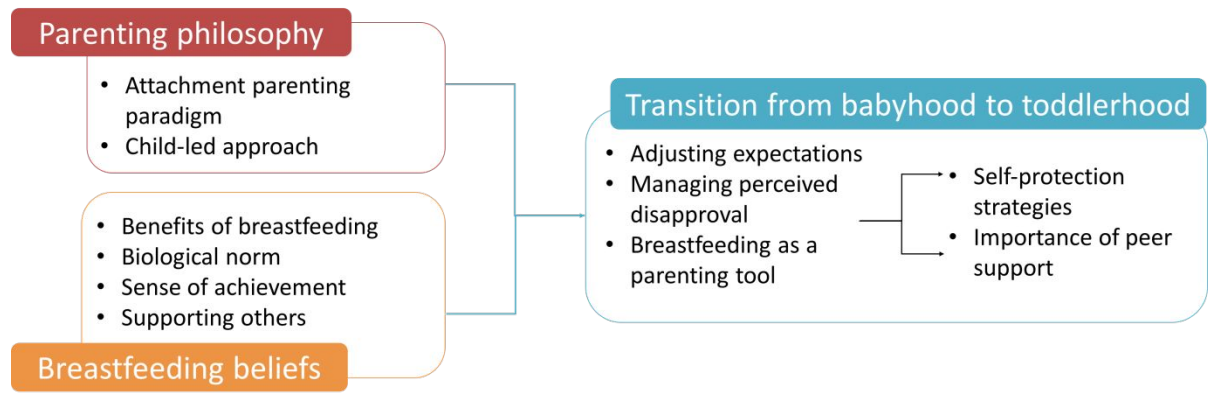

For peer review only

## ADDITIONAL FILE 1

| Theme                        | Sub-Theme                     | Quote                                                                                                                                                                                                                                                                                                                                                                                                                                                                                                                                                                                                                                                        | Participant |
|------------------------------|-------------------------------|--------------------------------------------------------------------------------------------------------------------------------------------------------------------------------------------------------------------------------------------------------------------------------------------------------------------------------------------------------------------------------------------------------------------------------------------------------------------------------------------------------------------------------------------------------------------------------------------------------------------------------------------------------------|-------------|
| <b>Parenting Philosophy</b>  | Attachment parenting paradigm | "My daughter was very demanding and quite communicative even as a newborn...She told us what she wanted and what she wanted was for us to be attachment parents, basically. That was not something I went into parenting thinking. I had no particular opinions on co-sleeping or anything else, really. It's just she slept better in bed with us so she slept in bed with us. She wanted to be on the breast so I put her on the breast. She didn't like the buggy, so I had her in a sling. I would find it hard to imagine that somebody who did extended breastfeeding never ever coslept or never baby carried, but it's entirely possible I suppose." | 16          |
|                              |                               | "I intended to follow the attachment parenting route, so I've kind of done that, but I have made different decisions along the way, or not made decisions and let him lead it more than I thought I would have done."                                                                                                                                                                                                                                                                                                                                                                                                                                        | 9           |
|                              |                               | "When we were running around in caves we didn't put our babies in cots in the next room, our babies were next to us because that's where they feel safe."                                                                                                                                                                                                                                                                                                                                                                                                                                                                                                    | 6           |
|                              | Child-led approach            | "We've carried on because it seems to be important to him."                                                                                                                                                                                                                                                                                                                                                                                                                                                                                                                                                                                                  | 10          |
|                              |                               | "If she wants to carry on I'm not going to cause her anxiety and stress by saying 'oh no you can't do that'. Obviously, I do every now and then, I have to distract her but I'm not going to wean her intentionally when that's what she wants."                                                                                                                                                                                                                                                                                                                                                                                                             | 12          |
|                              |                               | "It also didn't sit well with me emotionally, to force her into these things that didn't seem right for her. Her one comfort was breastfeeding. That was the thing that worked for her."                                                                                                                                                                                                                                                                                                                                                                                                                                                                     | 16          |
|                              |                               | "I have no intention of stopping until he wants to stop."                                                                                                                                                                                                                                                                                                                                                                                                                                                                                                                                                                                                    | 2           |
| <b>Breastfeeding Beliefs</b> | Benefits of breastfeeding     | "Anything that he needs at that moment, my milk is going to change to his needs. And if I get a cold, the antibodies will get passed through to him."                                                                                                                                                                                                                                                                                                                                                                                                                                                                                                        | 18          |
|                              |                               | "The main one in our house at the moment is the immunity because we have had continuous bugs in our house since the smallest one has been born, so I wonder where we would be if we didn't have that. And I know that that doesn't dissipate no matter what the age of the child, so I don't want to give that up."                                                                                                                                                                                                                                                                                                                                          | 10          |



|  |                      |                                                                                                                                                                                                                                                                                                                                                                                                                                                                                                                                                                 |    |
|--|----------------------|-----------------------------------------------------------------------------------------------------------------------------------------------------------------------------------------------------------------------------------------------------------------------------------------------------------------------------------------------------------------------------------------------------------------------------------------------------------------------------------------------------------------------------------------------------------------|----|
|  |                      | “When my child is sick, that’s the best time. That’s the best reassurance of knowing that I’m doing the best thing for him. Because he won’t eat anything else, not keeping anything else down, or if he’s lethargic, you know that they’re getting their vitamins and that’s the best feeling in the world.”                                                                                                                                                                                                                                                   | 14 |
|  |                      | “Some days my mum will say I offered her this but she didn’t have that, she did have a bit of cake or banana or yogurt, so sometimes nothing savory, but I know that at least at the start and the end of the day she’s getting that goodness from me. That’s a real plus point for still feeding.”                                                                                                                                                                                                                                                             | 19 |
|  |                      | “For me it wasn’t really about nutrition, although certainly there are nutritional benefits, but it was more about health benefits, bonding, the parenting tool which you can’t get from cow’s milk because it’s not the same thing.”                                                                                                                                                                                                                                                                                                                           | 15 |
|  | Biological norm      | “Just that it is biologically normal. That’s the main reason for feeding. We are mammals, and mammals are designed to feed their children. Evolution would tell you that that’s what is best for them.”                                                                                                                                                                                                                                                                                                                                                         | 1  |
|  |                      | “And the more I learned about how babies are, and about the breastfeeding dyad, and breastfeeding from an evolutionary perspective, baby brain and physical development, it just really made me realise the importance of breastfeeding as opposed to other feeding methods.”                                                                                                                                                                                                                                                                                   | 5  |
|  |                      | “I never thought this would be something I’d do, but when I looked into the fact that it is biologically normally, I decided to, why not? And it’s worked out for us.”                                                                                                                                                                                                                                                                                                                                                                                          | 15 |
|  | Sense of achievement | “My choice is to breastfeed my baby. Every other choice about my birth had been taken away from me – and that’s okay because we came out of it alive and that’s the main thing – but I was so determined not to lose this...For me, it’s this amazing achievement”                                                                                                                                                                                                                                                                                              | 11 |
|  |                      | “I feel lucky that I was able to breastfeed because I had a very difficult birth and my birth was not how I wanted it to be. For me, being able to breastfeed has been a gift to my child. And for me breastfeeding has been healing. I didn’t give birth in the way that I wanted to so being able to breastfeed has been a gift. It will be one of my greatest achievements and one of the greatest gifts that I could give to my son in lots of ways; health, emotionally... that’s why I want it to end well. I want it to be something that is beautiful.” | 9  |

|    |                                                |                                                                                                                                                                                                                                                                                                                                                                                                                                               |                                                                                                                                                                                                                                                                                                                                                                                                                                 |    |
|----|------------------------------------------------|-----------------------------------------------------------------------------------------------------------------------------------------------------------------------------------------------------------------------------------------------------------------------------------------------------------------------------------------------------------------------------------------------------------------------------------------------|---------------------------------------------------------------------------------------------------------------------------------------------------------------------------------------------------------------------------------------------------------------------------------------------------------------------------------------------------------------------------------------------------------------------------------|----|
| 1  |                                                |                                                                                                                                                                                                                                                                                                                                                                                                                                               |                                                                                                                                                                                                                                                                                                                                                                                                                                 |    |
| 2  |                                                |                                                                                                                                                                                                                                                                                                                                                                                                                                               |                                                                                                                                                                                                                                                                                                                                                                                                                                 |    |
| 3  |                                                |                                                                                                                                                                                                                                                                                                                                                                                                                                               |                                                                                                                                                                                                                                                                                                                                                                                                                                 |    |
| 4  |                                                |                                                                                                                                                                                                                                                                                                                                                                                                                                               |                                                                                                                                                                                                                                                                                                                                                                                                                                 |    |
| 5  |                                                |                                                                                                                                                                                                                                                                                                                                                                                                                                               |                                                                                                                                                                                                                                                                                                                                                                                                                                 |    |
| 6  |                                                |                                                                                                                                                                                                                                                                                                                                                                                                                                               |                                                                                                                                                                                                                                                                                                                                                                                                                                 |    |
| 7  |                                                |                                                                                                                                                                                                                                                                                                                                                                                                                                               |                                                                                                                                                                                                                                                                                                                                                                                                                                 |    |
| 8  |                                                |                                                                                                                                                                                                                                                                                                                                                                                                                                               |                                                                                                                                                                                                                                                                                                                                                                                                                                 |    |
| 9  |                                                |                                                                                                                                                                                                                                                                                                                                                                                                                                               |                                                                                                                                                                                                                                                                                                                                                                                                                                 |    |
| 10 |                                                |                                                                                                                                                                                                                                                                                                                                                                                                                                               |                                                                                                                                                                                                                                                                                                                                                                                                                                 |    |
| 11 |                                                |                                                                                                                                                                                                                                                                                                                                                                                                                                               |                                                                                                                                                                                                                                                                                                                                                                                                                                 |    |
| 12 |                                                |                                                                                                                                                                                                                                                                                                                                                                                                                                               |                                                                                                                                                                                                                                                                                                                                                                                                                                 |    |
| 13 |                                                |                                                                                                                                                                                                                                                                                                                                                                                                                                               |                                                                                                                                                                                                                                                                                                                                                                                                                                 |    |
| 14 |                                                |                                                                                                                                                                                                                                                                                                                                                                                                                                               |                                                                                                                                                                                                                                                                                                                                                                                                                                 |    |
| 15 |                                                |                                                                                                                                                                                                                                                                                                                                                                                                                                               |                                                                                                                                                                                                                                                                                                                                                                                                                                 |    |
| 16 |                                                |                                                                                                                                                                                                                                                                                                                                                                                                                                               |                                                                                                                                                                                                                                                                                                                                                                                                                                 |    |
| 17 |                                                |                                                                                                                                                                                                                                                                                                                                                                                                                                               |                                                                                                                                                                                                                                                                                                                                                                                                                                 |    |
| 18 |                                                |                                                                                                                                                                                                                                                                                                                                                                                                                                               |                                                                                                                                                                                                                                                                                                                                                                                                                                 |    |
| 19 |                                                |                                                                                                                                                                                                                                                                                                                                                                                                                                               |                                                                                                                                                                                                                                                                                                                                                                                                                                 |    |
| 20 |                                                |                                                                                                                                                                                                                                                                                                                                                                                                                                               |                                                                                                                                                                                                                                                                                                                                                                                                                                 |    |
| 21 |                                                |                                                                                                                                                                                                                                                                                                                                                                                                                                               |                                                                                                                                                                                                                                                                                                                                                                                                                                 |    |
| 22 |                                                |                                                                                                                                                                                                                                                                                                                                                                                                                                               |                                                                                                                                                                                                                                                                                                                                                                                                                                 |    |
| 23 |                                                |                                                                                                                                                                                                                                                                                                                                                                                                                                               |                                                                                                                                                                                                                                                                                                                                                                                                                                 |    |
| 24 |                                                |                                                                                                                                                                                                                                                                                                                                                                                                                                               |                                                                                                                                                                                                                                                                                                                                                                                                                                 |    |
| 25 |                                                |                                                                                                                                                                                                                                                                                                                                                                                                                                               |                                                                                                                                                                                                                                                                                                                                                                                                                                 |    |
| 26 |                                                |                                                                                                                                                                                                                                                                                                                                                                                                                                               |                                                                                                                                                                                                                                                                                                                                                                                                                                 |    |
| 27 |                                                |                                                                                                                                                                                                                                                                                                                                                                                                                                               |                                                                                                                                                                                                                                                                                                                                                                                                                                 |    |
| 28 |                                                |                                                                                                                                                                                                                                                                                                                                                                                                                                               |                                                                                                                                                                                                                                                                                                                                                                                                                                 |    |
| 29 |                                                |                                                                                                                                                                                                                                                                                                                                                                                                                                               |                                                                                                                                                                                                                                                                                                                                                                                                                                 |    |
| 30 |                                                |                                                                                                                                                                                                                                                                                                                                                                                                                                               |                                                                                                                                                                                                                                                                                                                                                                                                                                 |    |
| 31 |                                                |                                                                                                                                                                                                                                                                                                                                                                                                                                               |                                                                                                                                                                                                                                                                                                                                                                                                                                 |    |
| 32 |                                                |                                                                                                                                                                                                                                                                                                                                                                                                                                               |                                                                                                                                                                                                                                                                                                                                                                                                                                 |    |
| 33 |                                                |                                                                                                                                                                                                                                                                                                                                                                                                                                               |                                                                                                                                                                                                                                                                                                                                                                                                                                 |    |
| 34 |                                                |                                                                                                                                                                                                                                                                                                                                                                                                                                               |                                                                                                                                                                                                                                                                                                                                                                                                                                 |    |
| 35 |                                                |                                                                                                                                                                                                                                                                                                                                                                                                                                               |                                                                                                                                                                                                                                                                                                                                                                                                                                 |    |
| 36 |                                                |                                                                                                                                                                                                                                                                                                                                                                                                                                               |                                                                                                                                                                                                                                                                                                                                                                                                                                 |    |
| 37 |                                                |                                                                                                                                                                                                                                                                                                                                                                                                                                               |                                                                                                                                                                                                                                                                                                                                                                                                                                 |    |
| 38 |                                                |                                                                                                                                                                                                                                                                                                                                                                                                                                               |                                                                                                                                                                                                                                                                                                                                                                                                                                 |    |
| 39 |                                                |                                                                                                                                                                                                                                                                                                                                                                                                                                               |                                                                                                                                                                                                                                                                                                                                                                                                                                 |    |
| 40 |                                                |                                                                                                                                                                                                                                                                                                                                                                                                                                               |                                                                                                                                                                                                                                                                                                                                                                                                                                 |    |
| 41 |                                                |                                                                                                                                                                                                                                                                                                                                                                                                                                               |                                                                                                                                                                                                                                                                                                                                                                                                                                 |    |
| 42 |                                                |                                                                                                                                                                                                                                                                                                                                                                                                                                               |                                                                                                                                                                                                                                                                                                                                                                                                                                 |    |
| 43 |                                                |                                                                                                                                                                                                                                                                                                                                                                                                                                               |                                                                                                                                                                                                                                                                                                                                                                                                                                 |    |
| 44 |                                                |                                                                                                                                                                                                                                                                                                                                                                                                                                               |                                                                                                                                                                                                                                                                                                                                                                                                                                 |    |
| 45 |                                                |                                                                                                                                                                                                                                                                                                                                                                                                                                               |                                                                                                                                                                                                                                                                                                                                                                                                                                 |    |
| 46 |                                                |                                                                                                                                                                                                                                                                                                                                                                                                                                               |                                                                                                                                                                                                                                                                                                                                                                                                                                 |    |
|    | Supporting others                              | <p>"I needed breastfeeding counsellors coming to home to show me things. It's all very well saying oh well go out to a group, but at first it took me 10 days to leave the house and even then I was like oh my god, what am I doing? I want people coming to my house to help me and reassure that it's okay. Because we've lost all that. We've lost seeing other people feed. I think there should be way more support than there is."</p> | 13                                                                                                                                                                                                                                                                                                                                                                                                                              |    |
|    |                                                | <p>"I think the more help there is to enable people to breastfeed then the better it will be. Which is why I do what I do and spend so much time helping mums, giving advice, approving posts, become a peer support worker, because when I started I didn't even know I could go to a breastfeeding group, which I think would've really helped me and I might have made more friends with mums that are actually still breastfeeding"</p>   | 14                                                                                                                                                                                                                                                                                                                                                                                                                              |    |
|    |                                                | <p>"It just made me really want to support people, breastfeeding made me feel good so I just want to see more support for other women."</p>                                                                                                                                                                                                                                                                                                   | 5                                                                                                                                                                                                                                                                                                                                                                                                                               |    |
|    | <b>Transition from Babyhood to Toddlerhood</b> | Adjusting expectations                                                                                                                                                                                                                                                                                                                                                                                                                        | <p>"I thought he would wean when we started solids, and then I thought he would wean when I went back to work – convinced he was going to wean when I went back to work because I was doing night shifts. Then I was convinced he would wean when he started walking, because that was delayed. Then – when was the next time? – when I got pregnant. But he didn't, and then I gave up thinking he would wean after that."</p> | 10 |
|    |                                                |                                                                                                                                                                                                                                                                                                                                                                                                                                               | <p>"It's good to see that people are going for longer and feeding for longer, because I didn't presume it happened to be honest. You never really see it so I didn't know the time that you're supposed to breastfeed for."</p>                                                                                                                                                                                                 | 12 |
|    |                                                |                                                                                                                                                                                                                                                                                                                                                                                                                                               | <p>"I wanted to manage 6 weeks because I thought that was what people did, and then babies have bottles. The same way that babies wear nappies, babies have bottles."</p>                                                                                                                                                                                                                                                       | 4  |
|    |                                                | Managing perceived disapproval                                                                                                                                                                                                                                                                                                                                                                                                                | <p>"It seems like past a year, then people are like 'what are you doing? They can have cow's milk. Why would you bother?'"</p>                                                                                                                                                                                                                                                                                                  | 10 |
|    |                                                |                                                                                                                                                                                                                                                                                                                                                                                                                                               | <p>"There are so many people that would say that it's weird and what are you doing. And 'why hasn't he weaned, is there something wrong?'"</p>                                                                                                                                                                                                                                                                                  | 11 |
|    |                                                |                                                                                                                                                                                                                                                                                                                                                                                                                                               | <p>"I didn't want to feed in public. And when she was around 2 and having these tantrums I knew that breastfeeding would calm her down but I didn't want to do it and I was very self-conscious of that and I would get more stressed and she would get stressed."</p>                                                                                                                                                          | 16 |

|   |                                   |                                                                                                                                                                                                                                                                                                                                                                                                                                                             |    |
|---|-----------------------------------|-------------------------------------------------------------------------------------------------------------------------------------------------------------------------------------------------------------------------------------------------------------------------------------------------------------------------------------------------------------------------------------------------------------------------------------------------------------|----|
| 1 | <i>Self-protection strategies</i> | “But the toddler, I don’t do it [breastfeed] out in public. I annoy myself by not doing it out in public, because you don’t see people doing it out in public, so it’s not normalised, and I’m perpetuating this.”                                                                                                                                                                                                                                          | 4  |
| 2 |                                   | “I find myself using really apologetic language about it. And I have to sort of justify it.”                                                                                                                                                                                                                                                                                                                                                                | 19 |
| 3 |                                   | “I think once we got to the age of 1... you start to feel like you need to have the science to back it up.”                                                                                                                                                                                                                                                                                                                                                 | 1  |
| 4 | <i>Accessing support</i>          | “There was a breastfeeding class, not a class, a support group... But when my daughter got to a year old I realised that she was the oldest baby there, and people have given up a long time before. So I realised I was a bit of an outlier in terms of the duration but I am involved in a lot of breastfeeding groups on Facebook. I think you need that support.”                                                                                       | 12 |
| 5 |                                   | “Having a network and a group of other women who have gone through it, peer supporters and that, that’s a really important factor. Finding that group of people that share your views on breastfeeding. Without that, it would be a fairly lonely experience. I’ve made friends through breastfeeding that I still meet up with now.”                                                                                                                       | 6  |
| 6 |                                   | “I hear from a lot of mums that they are being told to stop night feeds by the health visitors and I think there’s a lot of opinion rather than evidence-based information out there. I see it as a big factor.”                                                                                                                                                                                                                                            | 5  |
| 7 | Breastfeeding as a parenting tool | “If he’s scared, that’s the first place he goes and he calms down like that. If he’s upset, he’ll have literally 20 seconds if that – it’s the best parenting tool I’ve ever had.”                                                                                                                                                                                                                                                                          | 2  |
| 8 |                                   | “To cure all problems – whether she’s warm or whether she’s cold or whether she’s thirsty or whether she’s just feeling a bit insecure or just needs a cuddle, you know that there’s one thing that fixes everything. Rather than having to do a checklist of saying well check her temperature, change the outfit, put her in the bath, or whatever, and having to go through the checklist and wonder what could possibly be wrong, it fixes everything.” | 12 |
| 9 |                                   | “It certainly makes life with a toddler so much easier if they fall down and scrape their knee or are scared about a situation or something it was so easy to have them nurse for a few seconds and then they’re back to being happy”                                                                                                                                                                                                                       | 7  |

## ADDITIONAL FILE 2

**Consolidated criteria for reporting qualitative studies (COREQ): 32-item checklist**

Developed from:

Tong A, Sainsbury P, Craig J. Consolidated criteria for reporting qualitative research (COREQ): a 32-item checklist for interviews and focus groups. *Int J Qual Health C.* 2007; 19(6): 349–357.

<http://dx.doi.org/10.1093/intqhc/mzm042>

| Topic                                      | Item No. | Guide Questions/Description                                                                                                                            | Reported on Page No. |
|--------------------------------------------|----------|--------------------------------------------------------------------------------------------------------------------------------------------------------|----------------------|
| <b>Domain 1: Research team reflexivity</b> |          |                                                                                                                                                        |                      |
| <i>Personal characteristics</i>            |          |                                                                                                                                                        |                      |
| Interviewer/facilitator                    | 1        | Which author/s conducted the interview or focus group?                                                                                                 | 8                    |
| Credentials                                | 2        | What were the researcher's credentials?                                                                                                                | 8                    |
| Occupation                                 | 3        | What was their occupation at the time of the study?                                                                                                    | 8                    |
| Gender                                     | 4        | Was the researcher male or female?                                                                                                                     | 8                    |
| Experience and training                    | 5        | What experience or training did the researcher have?                                                                                                   | 8                    |
| <i>Relationship with participants</i>      |          |                                                                                                                                                        |                      |
| Relationship established                   | 6        | Was a relationship established prior to study commencement?                                                                                            | 23                   |
| Participant knowledge of the interviewer   | 7        | What did the participants know about the researcher? E.g. personal goals, reasons for doing the research                                               | 23                   |
| Interviewer characteristics                | 8        | What characteristics were reported about the interviewer? E.g. bias, assumptions, reasons and interests in the research topic                          | 8, 23                |
| <b>Domain 2: Study design</b>              |          |                                                                                                                                                        |                      |
| <i>Theoretical framework</i>               |          |                                                                                                                                                        |                      |
| Methodological orientation and Theory      | 9        | What methodological orientation was used to underpin the study? E.g. grounded theory, discourse analysis, ethnography, phenomenology, content analysis | 7                    |
| <i>Participant selection</i>               |          |                                                                                                                                                        |                      |
| Sampling                                   | 10       | How were participants selected? E.g. purposive, convenience, consecutive, snowball                                                                     | 8                    |
| Method of approach                         | 11       | How were participants approached? E.g. face-to-face, telephone, mail, email                                                                            | 8                    |
| Sample size                                | 12       | How many participants were in the study?                                                                                                               | 8                    |
| Non-participation                          | 13       | How many people refused to participate or dropped out? Reasons?                                                                                        | 8                    |

|                                        |    |                                                                                                                                 |              |
|----------------------------------------|----|---------------------------------------------------------------------------------------------------------------------------------|--------------|
| <i>Setting</i>                         |    |                                                                                                                                 |              |
| Setting of data collection             | 14 | Where was the data collected? E.g. home, clinic, workplace                                                                      | 8,9          |
| Presence of non-participants           | 15 | Was anyone else present besides the participants and researchers?                                                               | 9            |
| Description of sample                  | 16 | What are the important characteristics of the sample? E.g. demographic data                                                     | 11 (table 3) |
| <i>Data collection</i>                 |    |                                                                                                                                 |              |
| Interview guide                        | 17 | Were questions, prompts, guides provided by the authors? Was it pilot tested?                                                   | 9 (table 1)  |
| Repeat interviews                      | 18 | Were repeat interviews carried out? If yes, how many?                                                                           | N/A          |
| Audio/visual recording                 | 19 | Did the research use audio or visual recording to collect the data?                                                             | 9            |
| Field notes                            | 20 | Were field notes made during and/or after the interview or focus group?                                                         | 9            |
| Duration                               | 21 | What was the duration of the interviews or focus group?                                                                         | 8            |
| Data saturation                        | 22 | Was data saturation discussed?                                                                                                  | 8            |
| Transcripts returned                   | 23 | Were transcripts returned to participants for comment and/or correction?                                                        | N/A          |
| <b>Domain 3: analysis and findings</b> |    |                                                                                                                                 |              |
| <i>Data analysis</i>                   |    |                                                                                                                                 |              |
| Number of data coders                  | 24 | How many data coders coded the data?                                                                                            | 9            |
| Description of the coding tree         | 25 | Did authors provide a description of the coding tree?                                                                           | N/A          |
| Derivation of themes                   | 26 | Were themes identified in advance or derived from the data?                                                                     | 7            |
| Software                               | 27 | What software, if applicable, was used to manage the data?                                                                      | 9            |
| Participant checking                   | 28 | Did participants provide feedback on the findings?                                                                              | N/A          |
| <i>Reporting</i>                       |    |                                                                                                                                 |              |
| Quotations presented                   | 29 | Were participant quotations presented to illustrate the themes/findings? Was each quotation identified? E.g. participant number | 12-21        |
| Data and findings consistent           | 30 | Was there consistency between the data presented and the findings?                                                              | 12-21        |
| Clarity of major themes                | 31 | Were major themes clearly presented in the findings?                                                                            | 12-21        |
| Clarity of minor themes                | 32 | Is there a description of diverse cases or discussion of minor themes?                                                          | 12-21        |

# BMJ Open

## **“Surely you’re not still breastfeeding”: A qualitative exploration of women’s experiences of breastfeeding beyond infancy in the United Kingdom**

|                                 |                                                                                                                                                                                                                                                                                               |
|---------------------------------|-----------------------------------------------------------------------------------------------------------------------------------------------------------------------------------------------------------------------------------------------------------------------------------------------|
| Journal:                        | <i>BMJ Open</i>                                                                                                                                                                                                                                                                               |
| Manuscript ID                   | bmjopen-2019-035199.R1                                                                                                                                                                                                                                                                        |
| Article Type:                   | Original research                                                                                                                                                                                                                                                                             |
| Date Submitted by the Author:   | 03-Feb-2020                                                                                                                                                                                                                                                                                   |
| Complete List of Authors:       | Thompson, Amy; University of Birmingham College of Medical and Dental Sciences<br>Topping, AE; University of Birmingham, Institute of Clinical Sciences; University Hospitals Birmingham NHS Foundation Trust<br>Jones, Laura; University of Birmingham, Institute of Applied Health Research |
| <b>Primary Subject Heading</b>: | Qualitative research                                                                                                                                                                                                                                                                          |
| Secondary Subject Heading:      | Public health                                                                                                                                                                                                                                                                                 |
| Keywords:                       | QUALITATIVE RESEARCH, PUBLIC HEALTH, Maternal medicine < OBSTETRICS                                                                                                                                                                                                                           |
|                                 |                                                                                                                                                                                                                                                                                               |

SCHOLARONE™  
Manuscripts

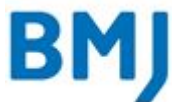

I, the Submitting Author has the right to grant and does grant on behalf of all authors of the Work (as defined in the below author licence), an exclusive licence and/or a non-exclusive licence for contributions from authors who are: i) UK Crown employees; ii) where BMJ has agreed a CC-BY licence shall apply, and/or iii) in accordance with the terms applicable for US Federal Government officers or employees acting as part of their official duties; on a worldwide, perpetual, irrevocable, royalty-free basis to BMJ Publishing Group Ltd ("BMJ") its licensees and where the relevant Journal is co-owned by BMJ to the co-owners of the Journal, to publish the Work in this journal and any other BMJ products and to exploit all rights, as set out in our [licence](#).

The Submitting Author accepts and understands that any supply made under these terms is made by BMJ to the Submitting Author unless you are acting as an employee on behalf of your employer or a postgraduate student of an affiliated institution which is paying any applicable article publishing charge ("APC") for Open Access articles. Where the Submitting Author wishes to make the Work available on an Open Access basis (and intends to pay the relevant APC), the terms of reuse of such Open Access shall be governed by a Creative Commons licence – details of these licences and which [Creative Commons](#) licence will apply to this Work are set out in our licence referred to above.

Other than as permitted in any relevant BMJ Author's Self Archiving Policies, I confirm this Work has not been accepted for publication elsewhere, is not being considered for publication elsewhere and does not duplicate material already published. I confirm all authors consent to publication of this Work and authorise the granting of this licence.

## TITLE PAGE

**“Surely you’re not *still* breastfeeding”:****A qualitative exploration of women’s experiences of breastfeeding beyond infancy in the  
United Kingdom**

Authors: Amy J Thompson<sup>a</sup>, Anne E Topping<sup>b,c</sup>, Laura L Jones<sup>d</sup>

Affiliations: <sup>a</sup>College of Medical and Dental Sciences, University of Birmingham, Birmingham, UK, <sup>b</sup>Institute of Clinical Sciences, University of Birmingham, Birmingham, UK, <sup>c</sup>University Hospitals Birmingham NHS Foundation Trust, Birmingham, UK, <sup>d</sup>Institute of Applied Health Research, University of Birmingham, Birmingham, UK

Email addresses: [AJT361@student.bham.ac.uk](mailto:AJT361@student.bham.ac.uk), [A.E.Topping@bham.ac.uk](mailto:A.E.Topping@bham.ac.uk),  
[L.L.Jones@bham.ac.uk](mailto:L.L.Jones@bham.ac.uk)

Corresponding author: Laura L Jones

Title: “Surely you’re not *still* breastfeeding”: A qualitative exploration of women’s experiences of breastfeeding beyond infancy in the United Kingdom

Abstract word count: 296

Article word count (excluding indented quotes): 4652

Number of figures: 2

Number of tables: 3

Number of additional files: 2



## ABSTRACT

**Objectives:** To explore women's experiences of breastfeeding beyond infancy (>1 year). Understanding these experiences, including the motivators, enablers and barriers faced, may help inform future strategies to support and facilitate mothers to breastfeed for an optimal duration.

**Design:** An exploratory qualitative study using an interpretive approach. Nineteen semi-structured interviews were conducted (in-person, or via phone or Skype), transcribed and thematically analysed using the Framework Method.

**Setting:** Participants drawn from across the United Kingdom through online breastfeeding support groups.

**Participants:** Maximum variation sample of women currently breastfeeding a child older than one year, or who had done so in the previous five years. Participants were included if over 18, able to speak English at conversational level and resident in the UK.

**Results:** The findings offer insights into the challenges faced by women breastfeeding older children, including perceived social and cultural barriers. Three core themes were interpreted: (1) Parenting philosophy; (2) Breastfeeding beliefs; (3) Transition from babyhood to toddlerhood. Women had not intended to breastfeed beyond infancy prior to delivery, but developed a 'child-led' approach to parenting and internalised strong beliefs that breastfeeding is the biological norm. Women perceived a negative shift in approval for continued breastfeeding as their child transitioned from 'baby' to 'toddler'. This compelled woman to conceal breastfeeding and fostered a reluctance to seek advice from healthcare professionals. Mothers reported feeling pressured to breastfeed when their babies were young, but discouraged as children grew. They identified best with the term "natural-term breastfeeding".

**Conclusions:** This study suggests that providing antenatal education regarding biological weaning-ages and promotion of guidelines for optimum breastfeeding duration may encourage more women to breastfeed for longer. Promoting the concept of natural-term breastfeeding to mothers, and healthcare professionals, employers and the public is necessary to normalise and encourage acceptance of breastfeeding beyond infancy.

## KEYWORDS

Breastfeeding; Lactation; Social Stigma; Social Support; natural-term breastfeeding;  
Qualitative Research

STRENGTHS AND LIMITATIONS OF THIS STUDY

- This interpretive, exploratory qualitative study contributes to the growing, but limited, literature on longer-term breastfeeding and identifies some potential practical solutions which may support women to breastfeed for an optimal duration.
- Due to the potentially sensitive nature of the topic, it can be difficult to identify and access breastfeeding women; however, this study used social media as a platform for recruitment, which allowed construction of a maximum variation sample, thereby increasing transferability.
- This study has a relatively large sample size with rich data, and analytic data saturation was achieved.
- Participants were predominantly white and highly educated, which could limit transferability, however, this may also reflect that this demographic is most likely to breastfeed past infancy.
- One of the authors has breastfed an older child, so a reflexive approach was important to mitigate the ways in which this may have inadvertently shaped data collection; a second analyst provided a different stance.

## MAIN TEXT

**INTRODUCTION**

The fundamental importance of breastfeeding to the health and development of children is well established (1). The Lancet Breastfeeding Series synthesises comprehensive evidence demonstrating that breastfeeding offers the best nutritional start for infants, conferring short-term benefits such as lower infectious morbidity and mortality, as well as life-long protection against obesity and diabetes mellitus (1, 2). Mothers who breastfeed also benefit from reduced risk of breast cancer, and potentially ovarian cancer and diabetes (1).

The World Health Organization (WHO) currently recommends that infants in all settings should be exclusively breastfed until six months of age, after which they should receive nutritious complementary foods alongside continued breastfeeding for two years or beyond (3). However, it is important to highlight that the WHO recommendation lacks clarity regarding the duration for which the benefits of breastfeeding are sustained beyond 24 months.

Significant efforts have been made to promote breastfeeding, often focused on educating new and expectant mothers regarding benefits of breastfeeding (4), which to some extent have been successful. The last national Infant Feeding Survey (IFS) was conducted in 2010, and the results showed that 81% of babies born in the UK were breastfed at birth (5). However, that proportion fell sharply: at six months postpartum, the proportion of mothers exclusively breastfeeding was around 1%, and only 25% of infants were still receiving any breastmilk (5). Breastfeeding status after six months was not recorded and so it is difficult to estimate breastfeeding rates beyond this (6). The IFS has now been discontinued, and data

1  
2  
3 relating to breastfeeding initiation in England is captured and reported by NHS Digital via  
4 the Maternity Services Data Set (MSDS), and breastfeeding status at 6-8 weeks through the  
5 Children and Young People's Health Services (CYPHS) Data Set (7). As such, more recent data  
6 on breastfeeding rates at six months is unavailable. However, in 2018 Scotland published  
7 the results of its Maternal and Infant Nutrition Survey, in which 43% of respondents  
8 reported providing breastmilk to their infants at six months (8), although no data were  
9 provided about exclusive breastfeeding at six months. These data suggest that more women  
10 are breastfeeding and for longer. It is therefore important to understand the experiences  
11 and needs of these mothers who continue breast feeding beyond six months.  
12  
13  
14  
15  
16  
17  
18  
19  
20  
21  
22  
23  
24  
25  
26  
27

28 A recent large meta-analysis determined that breastfeeding should continue until at least  
29 two years to achieve its full effect (1). Protection from infectious diseases has been shown  
30 to persist into at least the second year of life, and longer breastfeeding durations were  
31 associated with a higher Intelligence Quotient (IQ), and a lower risk of obesity in the long-  
32 term (1,2). Additionally, fostering optimal breastfeeding duration has economic advantages,  
33 both in terms of reducing healthcare expenditure through decreasing infant morbidity and  
34 mortality (9), and increasing children's educational potential and likely future earnings,  
35 while simultaneously promoting social equity (10).  
36  
37  
38  
39  
40  
41  
42  
43  
44  
45  
46  
47  
48  
49

50 Almost all women are biologically able to breastfeed, except for those with a (very) few  
51 limiting medical disorders (11). Whilst initiation rates are high (5), most women discontinue  
52 much earlier than recommendations advise. It has been suggested that once breastfeeding  
53 has been established, one of the main factors influencing breastfeeding duration is the  
54 social environment in which breastfeeding occurs (12), with a wide range of social, cultural  
55  
56  
57  
58  
59  
60

1  
2  
3 and market factors shaping decisions to continue, or persist (13). Research has found that  
4  
5 worries about breastfeeding in public are prevalent (14), and negative reactions from  
6  
7 others, and the feelings invoked by those reactions, contribute to decisions about how long  
8  
9 to breastfeed (15). Previous qualitative research with breastfeeding mothers has found that  
10  
11 many receive persistent, unsolicited advice about the need to wean and are encouraged to  
12  
13 discontinue from nursing “too long” (4). Breastfeeding behaviours are, it seems, open to  
14  
15 public evaluation, commented upon and criticised by family, friends, and strangers (16),  
16  
17 resulting in stigma and social sanctioning (4,17). Whilst a substantial body of qualitative  
18  
19 research exists examining women’s breastfeeding experiences there are relatively fewer  
20  
21 studies that have explored experiences of breastfeeding beyond six months (18). The small  
22  
23 number of more recent studies have found that women nursing older children feel highly  
24  
25 scrutinized (19), frequently face negative attitudes and criticism from others (18-21), and  
26  
27 experience marginalization (19).  
28  
29  
30  
31  
32  
33  
34  
35  
36  
37  
38  
39  
40  
41  
42  
43  
44  
45  
46  
47  
48  
49  
50  
51  
52  
53  
54  
55  
56

Building on this limited literature, this interpretive qualitative study aims to focus explicitly  
on women’s experiences of breastfeeding beyond infancy (> 1 year of age). Understanding  
women’s experiences, including the motivators, enablers and barriers faced, may help  
inform future strategies to support and facilitate mothers to breastfeed for an optimal or  
‘natural-term’ duration. Throughout the paper, the term “weaning” is used to describe the  
process of stopping breastfeeding and is distinct from the process of introducing  
supplementary foods.

## **METHODS**

### **ETHICS**

1  
2  
3 Ethical approval was sought and a favourable decision obtained from the University of  
4  
5 Birmingham Internal Ethics Review Committee (ref: IREC2017/1319061).  
6  
7  
8  
9

## 10 AIM

11  
12 To explore women's experiences of breastfeeding beyond one year of age including: beliefs  
13  
14 and motivations regarding breastfeeding beyond infancy; perceptions of support;  
15  
16 perceptions of enablers, facilitators and barriers to continued breastfeeding, and the  
17  
18 influence of these factors on feeding decisions.  
19  
20  
21  
22  
23  
24

## 25 DESIGN AND SETTING

26  
27 This exploratory, interpretive qualitative study was deemed the most appropriate design to  
28  
29 explore decision-making processes, beliefs and experiences (22), and particularly well-suited  
30  
31 to researching breastfeeding experiences (23). The study is reported using COREQ guidelines  
32  
33 (24) (see Additional File 1). Semi-structured interviews were chosen to better elicit accounts  
34  
35 that provided a deep understanding of women's perceptions and their impact upon their  
36  
37 behaviour (25). They were favoured over a group data collection approach in order to allow  
38  
39 individual narratives to be explored. Interviews were conducted face to face, or via phone or  
40  
41 Skype, depending on participant preference and location so as not to limit participation due  
42  
43 to geographical location or cost.  
44  
45  
46  
47  
48  
49  
50

## 51 PARTICIPANTS

52  
53 Participants were women aged at least 18 years currently breastfeeding a child older than  
54  
55 one year, or who had done so in the previous five years. Participants were included if able  
56  
57 to speak English at conversational level and willing and able to provide informed consent.  
58  
59  
60

1  
2  
3 Given that the social and cultural climate in which breastfeeding occurs has been shown to  
4 influence women's experiences (12), only women resident in the UK who had breastfed for  
5 an extended period were eligible to participate.  
6  
7  
8  
9

### 10 11 12 13 SAMPLING AND RECRUITMENT

14  
15 A purposive sample using a maximum variation sampling frame (26) including: age; number  
16 of children, and longest duration breastfeeding one child was employed. Recruitment  
17 adverts were posted through online Facebook breastfeeding support groups. Potential  
18 participants were invited to complete an online screening survey, which assessed eligibility  
19 and collected data on selected sampling variables to facilitate sample construction. 191  
20 women completed the survey, all of which were eligible. Based on sampling frame variables  
21 highlighted above, 30 women were contacted via email with further detailed study  
22 information: 27 were willing to take part; three did not respond. Data collection continued  
23 to be scheduled until analytic saturation was achieved, defined as the point when no further  
24 themes or concepts were surfaced from further interviews (27). Nineteen interviews  
25 contributed to the final dataset from across the UK. Women who were not interviewed  
26 were politely informed by email that data was no longer being actively collected. A  
27 flowchart of this process is shown in Figure 1.  
28  
29  
30  
31  
32  
33  
34  
35  
36  
37  
38  
39  
40  
41  
42  
43  
44  
45  
46  
47  
48  
49

### 50 DATA COLLECTION

51  
52 Prior to interview, all participants provided informed consent. In the case of telephone or  
53 Skype interviews, this was completed electronically. Participants were requested to  
54 complete a short demographic questionnaire to facilitate description of the sample (see  
55 Results). Interviews were conducted by AJT (female, two children). A topic guide was  
56  
57  
58  
59  
60

1  
2  
3 developed, informed by the existing literature on breastfeeding determinants (see Table 1),  
4  
5 and used flexibly as a framework for the semi-structured interviews. Analysis occurred  
6  
7 concurrently with data collection, allowing iterative updating of the topic guide and coding  
8  
9 frame. Open questions were used to facilitate extended answers, and probes to extract  
10  
11 further detail. Interviews were conducted either face-to-face (n=6), via telephone (n=8), or  
12  
13 via Skype (n=5), and lasted an average of 45 minutes (range: 28 to 77 minutes). Face-to-face  
14  
15 interviews were conducted in the participants' own homes at mutually agreed times.  
16  
17 Participants' children or other family members could be present, at participants' discretion.  
18  
19 Interviews were digitally audio-recorded with consent, and brief field notes made to aid  
20  
21 reflection. All participants were offered a £10 shopping voucher upon interview completion.  
22  
23  
24  
25  
26  
27  
28  
29

30 Table 1. Sample of discussion guide prompts  
31

| <b>Sample prompts for discussion</b>                                                                       |
|------------------------------------------------------------------------------------------------------------|
| When you were pregnant with your first baby, what were your thoughts on breastfeeding?                     |
| Can you tell me your thoughts on weaning? How did you/do you plan to manage the process?                   |
| Why have you chosen/did you choose to continue breastfeeding your child?                                   |
| How do you feel about nursing in public? Has this changed over time and how?                               |
| Can you tell me about support you have had for continuing to breastfeed?                                   |
| Are you part of any breastfeeding support groups? Why did you join, and what do you get from these groups? |
| Has anything ever made you consider stopping breastfeeding?                                                |

32  
33  
34  
35  
36  
37  
38  
39  
40  
41  
42  
43  
44  
45  
46  
47  
48  
49  
50  
51  
52  
53  
54  
55  
56  
57  
58  
59  
60

## ANALYSIS



1  
2  
3 Audio-recordings were transcribed verbatim and anonymised, removing any personal  
4  
5 identifying information. Transcripts were read repeatedly to enable familiarisation and  
6  
7 immersion. Interview transcripts were coded inductively by one of the authors (AJT),  
8  
9 facilitated by NVivo version 11 software, and analysed thematically, guided by the  
10  
11 Framework Method (see Table 2) (28). Initial codes and themes were discussed and agreed  
12  
13 by two authors (AJT and LLJ), before developing an analytical framework into which  
14  
15 subsequent transcripts were charted. Charting produced a highly organised matrix of  
16  
17 summarised data, which allowed data to be compared and contrasted whilst retaining the  
18  
19 wider context of each case, thereby encouraging thick description. The analytical framework  
20  
21 was finalised after extensive discussion between authors.  
22  
23  
24  
25  
26  
27  
28  
29

30 Table 2. Analysis process  
31

| Summary of Framework Approach Analysis Procedure |                                                                                                                                                                                                                                                                                                                  |
|--------------------------------------------------|------------------------------------------------------------------------------------------------------------------------------------------------------------------------------------------------------------------------------------------------------------------------------------------------------------------|
| Stage 1:<br>Transcription                        | Audio recordings are used to produce a verbatim transcription of the interview. Since the content is what is of primary interest, clean verbatim transcriptions are sufficient. The transcription process is a good opportunity to begin immersion in the data.                                                  |
| Stage 2:<br>Familiarisation                      | Familiarisation with whole interviews using audio-recordings and/or transcripts and any field notes is a vital stage in interpretation. Any initial analytical notes, thoughts or impressions are recorded.                                                                                                      |
| Stage 3:<br>Coding                               | Transcripts are read line-by-line, and a label ('code') is applied to each passage which summarises the important messages from that section. Because this study was inductive in nature, an open coding framework was applied i.e. coding anything potentially relevant rather than applying pre-defined codes. |

|                                                    |                                                 |                                                                                                                                                                                                                                                                                                                                                                   |
|----------------------------------------------------|-------------------------------------------------|-------------------------------------------------------------------------------------------------------------------------------------------------------------------------------------------------------------------------------------------------------------------------------------------------------------------------------------------------------------------|
| 1<br>2<br>3<br>4<br>5<br>6<br>7<br>8<br>9          | Stage 4:<br>Development of analytical framework | When some initial transcripts have been coded, the researcher decides on a set of codes which will then be applied to all subsequent transcripts. Codes can be grouped together into categories or themes.                                                                                                                                                        |
| 10<br>11<br>12<br>13<br>14<br>15<br>16<br>17       | Stage 5:<br>Application of analytical framework | The working analytical framework is applied to all subsequent transcripts, and is iteratively updated as new codes emerge. In this study NVivo software was used to facilitate this stage.                                                                                                                                                                        |
| 18<br>19<br>20<br>21<br>22<br>23<br>24<br>25<br>26 | Stage 6:<br>Charting data into framework matrix | A matrix is generated using a spreadsheet, and the data from each transcript are 'charted' into the matrix. Data is summarised by category from each transcript, in a way which reduces the volume of data while still retaining the original meanings and sentiments of the participant. Interesting or illustrative quotations are also included in the matrix. |
| 27<br>28<br>29<br>30<br>31<br>32                   | Step 7:<br>Interpretation                       | Gradually, characteristics of the data are identified, and theories or models explaining the narrative can be developed.                                                                                                                                                                                                                                          |

### PATIENT AND PUBLIC INVOLVEMENT

There were no funds or time allocated for PPI so we were unable to involve patients. We have invited patients to help us develop our dissemination strategy.

### RESULTS

19 interviews contributed to the final dataset. Table 3 contains a summary of participants' demographic characteristics.

Table 3: Participant characteristics table

| ID | Age (years) | Number of Children | Duration breast-feeding(years) | Currently breast-feeding? | Marital status | Employment status    | Highest level of education | Ethnicity     |
|----|-------------|--------------------|--------------------------------|---------------------------|----------------|----------------------|----------------------------|---------------|
| P1 | 40-49       | 1                  | 3-4                            | Yes                       | Married        | Employed – Part-time | Postgraduate               | White British |

|     |       |   |     |     |             |                      |                   |               |
|-----|-------|---|-----|-----|-------------|----------------------|-------------------|---------------|
| P2  | 30-39 | 1 | 1-2 | Yes | Married     | Employed – Part-time | Postgraduate      | White British |
| P3  | 30-39 | 2 | 2-3 | No  | Married     | Employed – Full-time | Postgraduate      | White British |
| P4  | 30-39 | 2 | 3-4 | Yes | Married     | Student              | Postgraduate      | White British |
| P5  | 30-39 | 2 | 2-3 | No  | Married     | Self-employed        | Postgraduate      | White British |
| P6  | 40-49 | 2 | 5-6 | Yes | Married     | Employed – Full-time | Postgraduate      | White British |
| P7  | 40-49 | 4 | 5-6 | Yes | Married     | Homemaker            | Bachelor's degree | White Other   |
| P8  | 30-39 | 1 | 1-2 | Yes | Married     | Employed – Full-time | Postgraduate      | White Other   |
| P9  | 40-49 | 1 | 7-8 | Yes | Single      | Self-employed        | Bachelor's degree | White British |
| P10 | 20-29 | 2 | 3-4 | Yes | Married     | Employed – Full-time | Bachelor's degree | White British |
| P11 | 30-39 | 1 | 3-4 | Yes | Co-habiting | Employed – Full-time | Bachelor's degree | White British |
| P12 | 20-29 | 1 | 1-2 | Yes | Co-habiting | Employed – Full-time | Bachelor's degree | White British |
| P13 | 30-39 | 3 | 3-4 | Yes | Married     | Homemaker            | Bachelor's degree | White British |
| P14 | 30-39 | 1 | 3-4 | Yes | Co-habiting | Employed – Part-time | A-Level           | White British |
| P15 | 30-39 | 4 | 4-5 | Yes | Married     | Self-employed        | Postgraduate      | White British |
| P16 | 30-39 | 2 | 3-4 | Yes | Married     | Homemaker            | Postgraduate      | White British |
| P17 | 20-29 | 2 | 5-6 | Yes | Single      | Homemaker            | GCSE              | White British |
| P18 | 30-39 | 1 | 2-3 | Yes | Married     | Employed – Full-time | Postgraduate      | Asian British |
| P19 | 30-39 | 1 | 1-2 | Yes | Married     | Employed – Part-time | Bachelor's degree | White British |

Three core themes were interpreted within the dataset: (1) Parenting philosophy; (2)

Breastfeeding beliefs; (3) Transition from babyhood to toddlerhood (Figure 2). Exemplar

quotations are embedded in the text, and further quotes are available in Additional File 2.

## 1 PARENTING PHILOSOPHY

### 1.1 Attachment Parenting Paradigm

Women's parenting styles and choices fell under the theme labelled attachment parenting paradigm (see Discussion for more explanation of this term), and women described their approach as "gentle parenting" (P14) which they felt contributed to their successful breastfeeding relationships. Some women identified themselves as "attachment parents" (P16), while others were unfamiliar with the term but described parenting practices consistent with the philosophy. All women breastfed their children on demand during infancy, all but two regularly co-slept with their children, and all felt it was important to rapidly respond to infant crying: "I've not been one to leave my child crying on their own. Children cry, that's fine, if they're with somebody." (P11). Most women had not intended to be 'attachment parents' prior to delivery, but instead adopted the approach after the child was born through an instinctive desire to respond to their child's cues and subsequently learned more about the philosophy. Forming a secure attachment with children was identified as being important. Continuing to breastfeed they felt promoted child security and confidence:

"...because they [child] have that closeness with you, security of breastfeeding, they're generally much more comfortable and settled when they're away from you. And we've never had an issue with him going to someone else, he'll quite happily go and play or go and be in a classroom." (P1)

Women felt their chosen parenting style was different but gave their child the self-assurance to be more independent. Participants felt there was a culture of forcing babies to be overly independent at a young age, "the majority of people still cry it out" (P14). They

1  
2  
3 described parents were under social pressure to conform to certain behaviours, such as  
4  
5 sleep training. As this mother describes:

6  
7  
8 “There were so many things that I felt I had to stop, like I had to stop sleeping with  
9  
10 the baby, they have to go to their cot, you have to sleep train them.” (P14).

11  
12  
13 Women felt that societal attitudes surrounding infant sleep were particularly unhelpful for  
14  
15 breastfeeding mothers, and could damage nursing relationships:

16  
17  
18 “Health visitors telling you to sleep train your baby that’s breastfed because they wake  
19  
20 up to feed at night time. It’s quite normal for a breastfed child to wake to feed at night.”  
21  
22 (P10)

23  
24  
25  
26  
27  
28 “That’s also something that you see in the press and the national health  
29  
30 recommendations ‘don’t co-sleep, don’t bedshare’. I think they put the wrong slant on  
31  
32 it, because it’s such an important part of a successful breastfeeding relationship.” (P2)

33  
34  
35  
36  
37 The women were aware of the link between co-sleeping and SIDS (see Discussion), but most  
38  
39 felt that the perceived benefits of co-sleeping outweighed the risk narrative from other  
40  
41 sources.  
42  
43  
44  
45  
46

## 47 **1.2 Child-led Approach**

48  
49 In all aspects of parenting, women emphasized the importance of following the child’s cues  
50  
51 and allowing the child to do things at their own pace: “I’m very much about letting him do  
52  
53 things when he’s ready” (P9). For most participants, this philosophy also extended to  
54  
55 weaning. Women explained that they continued to breastfeed because their child was not  
56  
57 yet ready to stop: “I would have quite happily have stopped two years ago but he’s kind of  
58  
59  
60

1  
2  
3 led it, and I've just let him really" (P6). Women generally felt that allowing their child to self-  
4  
5 wean was more important than continuing to breastfeed for a specified length of time:  
6  
7

8 "No one gives you a medal for breastfeeding, but I feel like I'll get one if I can  
9  
10 complete his breastfeeding journey on his terms...I feel like I'll give myself one for  
11  
12 it." (P10)  
13  
14  
15  
16  
17

## 18 2 BREASTFEEDING BELIEFS

### 19 2.1 Benefits of Breastfeeding

20  
21 All the women strongly believed that breastfeeding had been, and continued to be,  
22  
23 beneficial for their children in terms of nutrition and bonding. Health benefits were cited as  
24  
25 the most important, including improved long-term health outcomes, and avoidance of  
26  
27 short-term illnesses: "Although he got ill when he was a toddler, I do believe his illnesses  
28  
29 were shorter and probably less frequent." (P6). Participants also explained that when their  
30  
31 children were ill they would often continue nursing even if they refused other foods and  
32  
33 liquids, and were reassured that this would provide hydration and antibodies:  
34  
35  
36  
37  
38

39 "When he is sick he can have my milk and I don't have to worry quite so much about  
40  
41 whether he's hydrated and I know that he'll probably get better faster." (P7)  
42  
43  
44  
45  
46  
47

### 48 2.2 Biological Norm

49 A narrative repeatedly expressed was the strong belief that continued breastfeeding is the  
50  
51 biological norm: "For me the biggest thing is that it's biologically normal. And it's a normal  
52  
53 thing to do. Other cultures see it as normal." (P5). Women believed that by adhering to the  
54  
55 practices to which our ancestors were adapted would allow children to achieve their  
56  
57 biological potential. Most participants discussed human biological weaning-ages as a  
58  
59  
60

1  
2  
3 justification: "It's the biological norm for us as organisms...they naturally wean when they  
4 lose their milk teeth and their jaw shape changes so they can't latch." (P11). Participants  
5  
6 also cited traditional societies who continue to breastfeed their child beyond infancy:  
7  
8

9  
10 "I've read about other societies that children will feed until they get their back  
11  
12 molars when they're about 6 or 7" (P4).  
13  
14  
15  
16  
17

18 Women identified best with the term 'natural-term breastfeeding', explaining that  
19  
20 breastfeeding beyond infancy is an aspect of biological heritage. All participants expressed  
21  
22 dislike of the term 'extended breastfeeding' because "it makes it sound not-normal" (P18),  
23  
24 and believed that the practice was perceived as 'extended' due to culturally-imposed  
25  
26 expectations:  
27  
28

29  
30 "I believe in natural-term breastfeeding. It's important that people know it's not  
31  
32 extended, it's normal!" (P13)  
33  
34  
35  
36  
37

### 38 **2.3 Sense of Achievement**

39  
40 All participants expressed pride in their breastfeeding and believed it was an important  
41  
42 achievement. Paradoxically, successful breastfeeding engendered pride for participants  
43  
44 while they simultaneously expressed the belief that breastfeeding was normal and natural.  
45  
46 The women rationalized this inconsistency by describing breastfeeding as challenging and  
47  
48 therefore that success demonstrated commitment. Some women expressed feelings of  
49  
50 failure and guilt due to difficulties conceiving or traumatic births, but felt a sense of  
51  
52 redemption having successfully breastfed:  
53  
54  
55  
56  
57  
58  
59  
60

1  
2  
3 “For me breastfeeding has been healing. I didn’t give birth in the way that I wanted  
4  
5 to so being able to breastfeed has been a gift. It will be one of my greatest  
6  
7 achievements” (P9)  
8  
9

10  
11  
12  
13 “I think that because I couldn’t conceive them [naturally], I couldn’t give birth to him  
14  
15 naturally...I think it made me more determined to [breast] feed. It was the one thing  
16  
17 I could do.” (P6)  
18  
19

## 20 21 22 23 **2.4 Supporting Others**

24  
25 All the women expressed a desire to support other breastfeeding mothers. Many  
26  
27 acknowledged having experienced challenges in their own breastfeeding journeys, and felt  
28  
29 they would not have succeeded without support. Most participants reported that “there’s a  
30  
31 real lack of quality support” (P1), and worried that women are sometimes encouraged to  
32  
33 give-up breastfeeding rather than supported to continue. Support was considered  
34  
35 particularly important given that many people have mothers and grandmothers who did not  
36  
37 breastfeed so: “There’s not the natural support that we would traditionally have had in the  
38  
39 family” (P11).  
40  
41  
42  
43  
44  
45  
46

47 Additionally, participants found that conversations around breastfeeding were often a “very  
48  
49 difficult discussion” (P1) with new or expectant mothers because their desire to support  
50  
51 women could be perceived as pressure or criticism: “It’s hard to say without sounding like  
52  
53 I’m attacking people who do things differently.” (P13). Although the women felt proud of  
54  
55 their own breastfeeding achievements and wanted to share their experiences, they  
56  
57 described concern that expressing this could be perceived by others as conceited.  
58  
59  
60



### 3 TRANSITION FROM BABYHOOD TO TODDLERHOOD

#### 3.1 Adjusting Expectations

All of the women had planned to initiate breastfeeding, but had not intended to breastfeed beyond one year at the time of their first pregnancy. Instead, participants re-adjusted their breastfeeding intentions as children grew. Many of the women reported that they had not been aware of the recommendations regarding breastfeeding duration antenatally, and had been unaware it was possible to continue to feed an older child:

“I think it’s very ingrained in our society that kids don’t breastfeed: Babies wean onto solids and that’s the end of it. That’s what I thought happened. I didn’t realise it [lactation] carried on.” (P12)

Moreover, prior to having children, many women felt that breastfeeding an older child was “weird” (P1) or “crazy” (P13), and as such had to overcome their own prejudices as their children grew and continued to breastfeed.

All women had breastfed on demand when their infants were very young, but began to introduce boundaries as their babies became toddlers. The reasons for introducing boundaries varied, but were commonly cited as practical reasons such as encouraging children to sleep for longer stretches, and to avoid the need for nursing outside the home. The women felt it was important that the child could understand these boundaries and therefore rationalise and negotiate to agree mutually acceptable restrictions. Some women night-weaned their children, while others would limit the number or length of feeds. This negotiation process was important in allowing mothers to continue nursing, because continued breastfeeding without restrictions became tiring and impractical:

1  
2  
3 “He has that little bit more understanding... We now have a limit that there’s a time in  
4 the evening by which he needs to have milk because I find the later it gets the more  
5 uncomfortable. I’m tired, I get fed up, so he’s respecting that.” (P9)  
6  
7  
8  
9

### 10 11 12 13 **3.2 Managing Perceived Disapproval**

14  
15 Women described how perceived approval for breastfeeding changed as their child  
16 transitioned from ‘baby’ to ‘toddler’. Participants felt pressured to breastfeed when their  
17 babies were young, but discouraged as their child grew. Women were criticized for  
18 continuing to nurse and were openly questioned by family and co-workers about weaning  
19 intentions. The age at which they became aware of this sea change in attitudes varied, but  
20 was typically between one and two years. The child’s chronological age was a factor in this  
21 attitudinal shift, the child’s physical size and developmental abilities were also influential.  
22 Milestones perceived as significant in transitioning to ‘toddler’ were walking and the child  
23 being “able to ask for it [breastmilk]” (P11). Participants described being made to feel like an  
24 “outcast” (P14) or “outsider” (P17). Although the women felt judged, perceived disapproval  
25 was not sufficient to motivate weaning for most women. When asked whether anything had  
26 ever made them consider stopping breastfeeding, one participant explained she had  
27 struggled to cope with persistent criticism from co-workers:  
28  
29  
30  
31  
32  
33  
34  
35  
36  
37  
38  
39  
40  
41  
42  
43  
44  
45  
46

47 “I feel very under the microscope since I’ve come back to work. I’ve had comments  
48 like ‘well you’re still feeding her, what do you expect? She’s still using you as a  
49 dummy.’” (P19)  
50  
51  
52  
53

54 The women perceived that their decision to breastfeed was not considered private by family  
55 members or co-workers, and found their choices being discussed publicly:  
56  
57  
58  
59  
60

1  
2  
3 “They all think I’m mad, the whole family! They’re quite nice to my face... It’s more  
4  
5 that I know when I’m not in the room that comments are made about it, and I know  
6  
7 she [my mother] has said things to my husband.” (P6)  
8  
9

### 10 11 12 13 **3.2.1. Self-protection strategies** 14

15 In response to expressions of disapproval, women developed various self-protection  
16  
17 strategies. Some women were open about their ongoing nursing but felt the need to have  
18  
19 “scientific research to back it up” (P11) so they could “leap up and defend” (P5) their  
20  
21 decisions. Several women felt protected by the WHO recommendation of breastfeeding for  
22  
23 two years. However, most women concealed the fact they were breastfeeding an older  
24  
25 child. Participants who had previously felt confident to breastfeed in public began to avoid  
26  
27 feeding outside of the home:  
28  
29  
30

31  
32 “I would never feed him in public. I probably didn’t feed him in public much after he  
33  
34 was two.” (P6)  
35  
36  
37  
38  
39

40 “When I picked her up from nursery she would always want a feed and I didn’t just  
41  
42 feed her there, I would go and hide somewhere...I didn’t even tell the nursery staff I  
43  
44 was still breastfeeding” (P16)  
45  
46  
47  
48  
49

50 Women avoided conversations about nursing and would “keep it quiet” (P12) or lead others  
51  
52 to believe their children were weaned:  
53

54 “You reach a point where other people assume that the child has weaned and there  
55  
56 is no reason to correct that assumption...it’s just easier for both parties” (P7)  
57  
58  
59  
60

### 3.2.2. Accessing support

Peer support groups were important for participants to feel “accepted” (P2) and women were comforted “knowing that other people are doing it” (P10). Many women attended in-person support groups, but online groups became increasingly important as children aged. Peer advice was often sought as many women felt unable to seek professional support for fear of disapproval. Participants reported that healthcare professionals (HCPs) advised weaning as a solution to problems: “They’re like ‘can’t they just stop?’” (P10), and several participants reported being offended by comments made by doctors. One participant was asked: “Surely you’re not *still* breastfeeding? Are you going to do that until she goes to university?” (P16), and another told that continuing to breastfeed would be detrimental to her child:

“The consultant made some comments about how I should be considering weaning and not feeding my baby anymore because of her age... he told me there were no benefits to breastfeeding beyond two, and he told me that breastfeeding hinders children’s development.” (P5)

Women perceived that many HCPs were not aware of the benefits of breastfeeding and often anticipated negative responses; they therefore did not trust advice if the provider was perceived as unsupportive.

Participants reported that they developed personal concerns during subsequent pregnancies, including uncertainty about whether nursing during pregnancy is safe, and questions regarding the possibility or practicalities of tandem nursing more than one child. Women sought advice on these topics from peer groups, as there was concern that

professionals may have insufficient knowledge to provide support, or offer advice coloured by “opinion rather than evidence” (P5).

### 3.3 Breastfeeding as a parenting tool

When children became toddlers, women described using breastfeeding as a practical “parenting tool” (P2). Participants explained that breastfeeding was an effective way to calm and “reset” (P1) toddlers, and was useful to “control their behaviour” (P6). Women would offer breastmilk as a “modified cuddle” (P4) if children hurt themselves or became frightened:

“If he does get really upset about something and he can’t calm down usually he can settle with having a little bit of milk. So for me it’s like this cure all – it’s so wonderful; I rely on it quite a lot.” (P7)

One participant explained that breastfeeding had helped her child cope with a hospital admission:

“...they had to put a cannula in. I had him facing me while his arm was out, and I nursed him through that because it was so very distressing.” (P9)

Many participants also found breastfeeding a useful tool to manage night-waking, and was described as an “easy way to get them back to sleep” (P12).

## DISCUSSION

This study explored the experiences of 19 women who breastfed their child beyond one year of age and contributes to the limited, but growing, literature exploring experiences of

1  
2  
3 longer-term breastfeeding. Women in this study actively expressed dislike for the term  
4  
5 “extended breastfeeding”, which is the label often used to describe the practice of  
6  
7 breastfeeding beyond infancy in the academic literature (29) and by HCPs; they identified  
8  
9 best with the term “natural-term breastfeeding”. Women reported feeling pressured to  
10  
11 breastfeed when their babies were young, but equally felt pressured to discontinue as  
12  
13 children grew. Most participants were unaware of WHO guidelines for duration of  
14  
15 breastfeeding and thought breastfeeding an older child was ‘weird’ prior to delivery.  
16  
17 Women described having to overcome their own prejudices towards breastfeeding older  
18  
19 children, and perceived that doing so was considered socially deviant. It was perceived by  
20  
21 the women that most HCPs disapprove of breastfeeding beyond infancy, which fostered  
22  
23 reluctance to seek advice and support.  
24  
25  
26  
27  
28  
29  
30  
31

32  
33 Strengths of this study include its relatively large sample size with rich data, and that  
34  
35 analytic data saturation was achieved. Due to the potentially sensitive nature of  
36  
37 breastfeeding beyond infancy, women are often difficult to identify and access (29). Many  
38  
39 previous studies have recruited via advocacy groups (6,17,30,31); however, these women  
40  
41 may be considerably more open about their breastfeeding status and findings may not be  
42  
43 transferable to breastfeeding mothers in general. This study used social media as a platform  
44  
45 for recruitment, which allowed construction of a maximum variation sample including  
46  
47 women of a range of ages, with different numbers of children, and a wide range of  
48  
49 breastfeeding duration, thereby increasing transferability. Employing telephone and Skype  
50  
51 interviews as a method of data collection meant participation was not limited by  
52  
53 geographical location. Criticisms of these methods suggest they may impair rapport  
54  
55 formation and, in the case of telephone interviews, limit interpretation of non-verbal cues  
56  
57  
58  
59  
60

1  
2  
3 (32,33). However, the interviewer did not feel that rapport was compromised compared to  
4  
5 face-to-face interviews, and research suggests they are a viable alternative to face-to-face  
6  
7 qualitative interviews (32,33). Limitations of the study include that participants were  
8  
9 predominantly white and highly educated, however, this may also reflect that this  
10  
11 demographic is most likely to breastfeed past infancy (29). These findings may, therefore,  
12  
13 not be transferable to women from non-White backgrounds, and exploring the experiences  
14  
15 of women from black and minority ethnic (BAME) communities is an important area for  
16  
17 future research to ensure they are supported. It is also notable that only seven (37%) of the  
18  
19 19 participants were employed full-time, and further research exploring the impact of work  
20  
21 upon breastfeeding continuation may be valuable.  
22  
23  
24  
25  
26  
27  
28  
29

30 As in all qualitative research, researcher position and reflexivity were important  
31  
32 considerations. The interviewer (AJT) is a mother of two who has breastfed an older child  
33  
34 herself, and therefore it was important to adopt a reflexive approach (34) to mitigate the  
35  
36 ways in which this may have inadvertently shaped data collection. The 'insider' (35) position  
37  
38 of the interviewer may have been advantageous as participants can be more willing to share  
39  
40 their experiences with someone who they perceive to be understanding of their situation  
41  
42 (35). In addition, the researcher was equipped with insights to understand implied content,  
43  
44 and hence potentially elicit a deeper understanding of the phenomenon (35). An inductive  
45  
46 approach to analysis was adopted to ensure that interpreted themes were rooted in the  
47  
48 data (36), with a second analyst (LLJ) providing a different stance during interpretation as  
49  
50 this researcher had not breastfed beyond infancy.  
51  
52  
53  
54  
55  
56  
57  
58  
59  
60

1  
2  
3 In line with other studies (19,20,37,38) the decision to continue breastfeeding beyond  
4  
5  
6 infancy was shaped by parenting philosophy, and women reported childcare practices  
7  
8 consistent with the attachment parenting paradigm. However, this study found that the  
9  
10 adoption of this strategy was gradual, and not necessarily held prior to delivery. The  
11  
12 adoption of it occurs as the breastfeeding mother learns to parent, and instinctually follows  
13  
14 the cues of her infant, ultimately leading to the re-alignment of parenting beliefs and re-  
15  
16 interpretation of health advice. The philosophy holds such importance that the women  
17  
18 ultimately adopt subversive and secretive behaviour to continue breastfeeding, which they  
19  
20 perceive as necessary to optimally nurture the child. Further, this study found that the  
21  
22 philosophy evolved as children grew. Initially it was entirely 'child-led', but as children  
23  
24 became able to rationalise and negotiate the women introduced boundaries. This  
25  
26 negotiation was important for women to continue, as breastfeeding without boundaries  
27  
28 became arduous or impractical. Attachment parenting has its roots in Attachment Theory  
29  
30 (39), which posits that a strong emotional and physical connection to at least one primary  
31  
32 caregiver is critical to development. The term "attachment parenting" describes a style of  
33  
34 parenting which is highly responsive to infant cues (40), and typical behaviours include co-  
35  
36 sleeping, feeding on demand, extensive carrying and holding of infants, and rapid response  
37  
38 to crying (41). Research suggests that this parenting style is associated with enhanced brain  
39  
40 and social development, including peer relationships and schooling, and in the longer term  
41  
42 more favorable responses to stress (41).  
43  
44  
45  
46  
47  
48  
49  
50  
51  
52  
53

54 Co-sleeping was believed to be important in establishing a successful nursing relationship,  
55  
56 however, co-sleeping and night-feeding are not aligned with contemporary western cultural  
57  
58 expectations (29) which value prolonged periods of independent sleep (42). For women who  
59  
60



1  
2  
3 wish to co-sleep, the provision of safe co-sleeping advice may help facilitate establishment  
4  
5 and maintenance of successful breastfeeding. It is important to note that there is an  
6  
7 association between co-sleeping and sudden infant death syndrome (SIDS)(43,44). The  
8  
9 National Institute of Clinical Excellence (NICE) recommends that parents should be informed  
10  
11 of this association, but the guidance also states the causes of SIDS are likely to be multi-  
12  
13 factorial and a possible causality link with co-sleeping is not clearly established (44).  
14  
15  
16  
17  
18  
19

20 One motivator for breastfeeding beyond infancy which was repeatedly discussed was a  
21  
22 strong belief in breastfeeding as a biological norm. This echoes prior studies on longer-term  
23  
24 breastfeeding, in which mothers narrated their decisions to continue breastfeeding as  
25  
26 “natural” (37) and “evolutionarily appropriate” (19). From an evolutionary perspective,  
27  
28 modern human children are adapted to be breastfed for several years (45,46).  
29  
30  
31

32 Anthropological research estimates that the human biological weaning-age falls between  
33  
34 two and seven-and-a-half years of age, if based on physiological parameters alone (45).  
35  
36

37 Providing education on biological weaning-ages could contribute to normalisation of this  
38  
39 behaviour and motivate more women to breastfeed for longer.  
40  
41  
42  
43

44 Women perceived that breastfeeding an older child was considered socially deviant, and  
45  
46 experienced open comments and criticism, mirroring the findings of previous research (6,  
47  
48 17-21, 37). Women also perceived that most HCPs disapprove of, or are uneducated about,  
49  
50 breastfeeding beyond infancy, which fostered reluctance to seek advice and support from  
51  
52 professionals. Although UK child health records contain documentation to facilitate  
53  
54 conversations regarding infant feeding, the last section which formally documents a  
55  
56 discussion about breastfeeding occurs during the 9-12-month developmental review. Given  
57  
58  
59  
60

1  
2  
3 that women were hesitant to actively seek support, inclusion of a discussion around  
4  
5 breastfeeding at the two-year-review may promote normalcy and afford women a 'safe'  
6  
7 opportunity to discuss any issues with a HCP. It may also be prudent for midwives to discuss  
8  
9 breastfeeding with multiparous women early during subsequent pregnancies, as women  
10  
11 reported that becoming pregnant again prompted breastfeeding concerns. Assessing the  
12  
13 views and knowledge of HCPs about this is an important area for future research, to  
14  
15 establish whether additional training or guidance is needed.  
16  
17  
18  
19  
20  
21  
22

## 23 **CONCLUSION**

24  
25 Enabling optimal breastfeeding duration has potentially enormous health, social and  
26  
27 economic advantages (1,2,9). Women experience cultural and social barriers to  
28  
29 breastfeeding their children beyond infancy, which may compel women to conceal the  
30  
31 behaviour. Moreover, women are reluctant to seek support from HCPs due to fear of  
32  
33 judgement or pressure to wean. HCPs should be aware of the benefits of optimal duration  
34  
35 breastfeeding, and be mindful of their terminology when consulting with women, for  
36  
37 example, using language such as "natural-term breastfeeding" rather than "extended  
38  
39 breastfeeding". Inclusion of a breastfeeding section, to facilitate formal documentation, at  
40  
41 the two-year-review may promote normalcy and afford women a 'safe' window of  
42  
43 opportunity to discuss potential issues. Education regarding biological weaning-ages and  
44  
45 promotion of WHO guidelines for minimum breastfeeding duration may encourage more  
46  
47 women to breastfeed for longer. As well as promoting natural-term breastfeeding to  
48  
49 mothers, education targeting the public and HCPs is necessary to encourage normalisation  
50  
51 and acceptance.  
52  
53  
54  
55  
56  
57  
58  
59  
60

## LIST OF ABBREVIATIONS

BAME: Black and minority ethnic

CYPHS: Children and Young People's Health Services

HCP: Healthcare professional

IFS: Infant Feeding Survey

MSDS: Maternity Services Data Set

NICE: National Institute of Clinical Excellence

NHS: National Health Service

SIDS: Sudden Infant Death Syndrome

WHO: World Health Organisation

## DECLARATIONS

**Ethics approval and consent to participate:** Ethical approval was sought and a favourable decision obtained from the University of Birmingham Internal Ethics Review Committee (ref: IREC2017/1319061). All participants provided informed consent prior to participation.

**Consent for publication:** Not applicable.

**Availability of data and material:** The datasets generated and analysed during the current study are not publicly available due to the risk of compromising the individual privacy of participants, but are available from the corresponding author on reasonable request.

**Competing interests:** The authors declare that they have no competing interests.

**Funding:** This research received no specific grant from any funding agency in the public, commercial or not-for-profit sectors.

1  
2  
3 **Patient and public involvement:** There were no funds or time allocated for PPI so we were  
4  
5 unable to involve patients. We have invited patients to help us develop our dissemination  
6  
7 strategy.  
8  
9

10 **Author contributions:** AJT conceived the study and designed it in collaboration with LLJ. AJT  
11  
12 conducted and transcribed the interviews. Data were coded by AJT. All authors contributed  
13  
14 to analysis and interpretation. Initial drafts of the manuscript were written by AJT, which  
15  
16 were reviewed and edited by LLJ and AET. All authors have read and approved the final  
17  
18 manuscript.  
19  
20  
21

22 **Acknowledgements:** The authors express gratitude to the administrators of the social  
23  
24 media groups who kindly allowed recruitment adverts to be posted on their sites. We thank  
25  
26 the women who took part for their time and candour, without whom this study would not  
27  
28 have been possible. We also thank the reviewers for their helpful and constructive  
29  
30 comments on our manuscript.  
31  
32  
33  
34  
35  
36  
37

### 38 **FIGURE TITLES**

39  
40 Figure 1. Flowchart summary of recruitment and sampling process

41  
42 Figure 2. Schematic representation of themes  
43  
44  
45  
46

### 47 **ADDITIONAL FILES**

48  
49 - **Additional file 1**

50  
51 PDF file

52  
53 Title: COREQ Checklist

54  
55 Description: Reports page numbers for each COREQ reporting criteria  
56  
57

58  
59 - **Additional file 2**  
60

1  
2  
3 PDF file

4  
5  
6 Title: Supplementary Quotes Table

7  
8 Description: Provides additional quotations to support themes  
9  
10  
11  
12  
13  
14

## 15 REFERENCES

- 16  
17  
18 (1) Victora CG, Bahl R, Barros AJD, Giovanny VA, Horton S, et al. Breastfeeding in the  
19  
20 21st century: epidemiology, mechanisms, and lifelong effect. *Lancet*.  
21  
22 2016;387:475-90.  
23  
24  
25 (2) Rollins NC, Bhandari N, Hajeebhoy N, Horton S, Lutter CK, et al. Why invest, and  
26  
27 what it will take to improve breastfeeding practices? *Lancet*. 2016;387:491-501.  
28  
29  
30 (3) World Health Organisation. Breastfeeding.  
31  
32 <https://www.who.int/topics/breastfeeding/en/>. Accessed 10 Jan 2019.  
33  
34  
35 (4) Stearns CA. Cautionary Tales About Extended Breastfeeding and Weaning. *Health*  
36  
37 *Care Women Int*. 2011;32(6):538–54.  
38  
39  
40 (5) McAndrew F, Thompson J, Fellows L, Large A, Speed M, Rendrew M. Infant  
41  
42 Feeding Survey 2010. 2012.  
43  
44 [http://doc.ukdataservice.ac.uk/doc/7281/mrdoc/pdf/7281\\_ifs-uk-](http://doc.ukdataservice.ac.uk/doc/7281/mrdoc/pdf/7281_ifs-uk-2010_report.pdf)  
45  
46 [2010\\_report.pdf](http://doc.ukdataservice.ac.uk/doc/7281/mrdoc/pdf/7281_ifs-uk-2010_report.pdf). Accessed 10 Jan 2019.  
47  
48  
49 (6) Dowling S, Pontin D. Using liminality to understand mothers' experiences of long-  
50  
51 term breastfeeding: 'Betwixt and between', and 'matter out of place.' *Health*.  
52  
53 2015;21(1):57–75.  
54  
55  
56  
57  
58  
59  
60

- 1  
2  
3 (7) NHS England. Maternity and Breastfeeding Statistics.  
4  
5 [https://www.england.nhs.uk/statistics/statistical-work-areas/maternity-and-](https://www.england.nhs.uk/statistics/statistical-work-areas/maternity-and-breastfeeding/)  
6 [breastfeeding/](https://www.england.nhs.uk/statistics/statistical-work-areas/maternity-and-breastfeeding/). Accessed 10 Jan 2019.  
7  
8  
9  
10 (8) Scottish Maternal and Infant Nutrition Surgery 2017. 2018.  
11  
12 [https://www.gov.scot/binaries/content/documents/govscot/publications/statisti](https://www.gov.scot/binaries/content/documents/govscot/publications/statistics-publication/2018/02/scottish-maternal-infant-nutrition-survey-2017/documents/00531610-pdf/00531610-pdf/govscot%3Adocument)  
13 [cs-publication/2018/02/scottish-maternal-infant-nutrition-survey-](https://www.gov.scot/binaries/content/documents/govscot/publications/statistics-publication/2018/02/scottish-maternal-infant-nutrition-survey-2017/documents/00531610-pdf/00531610-pdf/govscot%3Adocument)  
14 [2017/documents/00531610-pdf/00531610-pdf/govscot%3Adocument](https://www.gov.scot/binaries/content/documents/govscot/publications/statistics-publication/2018/02/scottish-maternal-infant-nutrition-survey-2017/documents/00531610-pdf/00531610-pdf/govscot%3Adocument). Accessed  
15  
16  
17  
18  
19  
20  
21 10 Jan 2019.  
22  
23 (9) Pokhrel S, Quigley MA, Fox-Rushby J, McCormick F, Williams A, Trueman P, et al.  
24  
25 Potential economic impacts from improving breastfeeding rates in the UK. Arch  
26  
27 Dis Child. 2014;100:430-7.  
28  
29  
30 (10) Hansen K. Breastfeeding: a smart investment in people and in economies. Lancet.  
31  
32 2016;387:416.  
33  
34  
35 (11) World Health Organization. Acceptable medical reasons for use of breast-milk  
36  
37 substitutes. 2009.  
38  
39  
40 [http://apps.who.int/iris/bitstream/handle/10665/69938/WHO\\_FCH\\_CAH\\_09.01](http://apps.who.int/iris/bitstream/handle/10665/69938/WHO_FCH_CAH_09.01_eng.pdf?ua=1)  
41 [\\_eng.pdf?ua=1](http://apps.who.int/iris/bitstream/handle/10665/69938/WHO_FCH_CAH_09.01_eng.pdf?ua=1). Accessed 10 Jan 2019.  
42  
43  
44  
45 (12) Kukla R. Ethics and Ideology in Breastfeeding Advocacy Campaigns. Hypatia.  
46  
47 2009;21(1):157–80.  
48  
49  
50 (13) Cattaneo A. Academy of Breastfeeding Medicine Founder’s Lecutere 2011:  
51  
52 Inequalities and Inequities in Breastfeeding: An International Perspective.  
53  
54 Breastfeed Med. 2012;7(1):3-9.  
55  
56  
57 (14) Sheeshka J, Potter B, Norrie E, Valaitis R, Adams G, Kuczynski L. Women’s  
58  
59 Experiences Breastfeeding in Public Places. J Hum Lact. 2001;17(1):31–8.  
60

- 1  
2  
3 (15) Boyer K. The emotional resonances of breastfeeding in public: The role of  
4  
5 strangers in breastfeeding practice. *Emot Sp Soc*. 2018;26:33–40.  
6  
7  
8 (16) Hauck Y, Irurita V. Incompatible expepectations: The dilemma of breastfeeding  
9  
10 mothers. *Health Care Women Int*. 2003;24(1):62–78.  
11  
12  
13 (17) Buckley KM. Beliefs and Practices Related to Extended Breastfeeding among La  
14  
15 Leche League Mothers. *J Perinat Educ*. 1992;1(2):45–53.  
16  
17  
18 (18) Dowling S, Brown A. An Exploration of the Experiences of Mothers Who  
19  
20 Breastfeed Long-Term: What Are the Issues and Why Does It Matter? *Breastfeed*  
21  
22 *Med*. 2012;8(1):45–52.  
23  
24  
25 (19) Faircloth CR. ‘If they want to risk the health and well-being of their child, that’s  
26  
27 up to them’: Long-term breastfeeding, risk and maternal identity. *Health Risk*  
28  
29 *Soc*. 2010;12(4):357–67.  
30  
31  
32 (20) Faircloth C. ‘What Science Says is Best’: Parenting Practices, Scientific Authority  
33  
34 and Maternal Identity. *Sociol Res Online*. 2010;15(4):1–14.  
35  
36  
37 (21) Newman KL, Williamson IR. Why aren’t you stopping now?!’ Exploring accounts  
38  
39 of white women breastfeeding beyond six months in the East of England.  
40  
41 *Appetite*. 2018;129:228–35.  
42  
43  
44 (22) Britten N, Jones R, Murphy E, Stacy R. Qualitative research methods in general  
45  
46 practice and primary care. *Fam Pract*. 1995;12(1):104–14.  
47  
48  
49 (23) Leeming D, Marshall J, Locke A. Understanding process and context in  
50  
51 breastfeeding support interventions: The potential of Qualitative Research.  
52  
53 *Matern Child Nutr*. 2017;13(4):e12407.  
54  
55  
56  
57  
58  
59  
60

- 1  
2  
3  
4  
5  
6  
7  
8  
9  
10  
11  
12  
13  
14  
15  
16  
17  
18  
19  
20  
21  
22  
23  
24  
25  
26  
27  
28  
29  
30  
31  
32  
33  
34  
35  
36  
37  
38  
39  
40  
41  
42  
43  
44  
45  
46  
47  
48  
49  
50  
51  
52  
53  
54  
55  
56  
57  
58  
59  
60
- (24) Tong A, Sainsbury P, Craig J. Consolidated criteria for reporting qualitative research (COREQ): a 32-item checklist for interviews and focus groups. *Int J Qual Heal Care*. 2007;19(6):349–57.
- (25) DiCicco-Bloom C, Crabtree BF. The qualitative research interview. *Med Educ*. 2006;40(4):314–21.
- (26) Patton M. *Qualitative Research and evaluation methods*. London: Sage Publications; 2004.
- (27) Glaser BG, Strauss AL. *The Discovery of Grounded Theory: Strategies for Qualitative Research*. Chicago: Aldine; 1976.
- (28) Gale NK, Heath G, Cameron E, Rashid S, Redwood S. Using the framework method for the analysis of qualitative data in multi-disciplinary health research. *BMC Med Res Methodol*. 2013;13(1):117.
- (29) Brockway M, Venturato L. Breastfeeding beyond infancy: a concept analysis. *J Adv Nurs*. 2016;72(9):2003–15.
- (30) Kendall-Tackett KA, Sugarman M. The Social Consequences of Long-Term Breastfeeding. *J Hum Lact*. 1995;11(3):179–83.
- (31) Gribble KD. Long-term breastfeeding; changing attitudes and overcoming challenges. *Breastfeeding Rev*. 2008;16(1):5-15.
- (32) Lo Iacono V, Symonds P, Brown DHK. Skype as a Tool for Qualitative Research Interviews. *Sociol Res Online*. 2016;21(2):103–117.
- (33) Trier-Bieniek A. Framing the telephone interview as a participant-centred tool for qualitative research: a methodological discussion. *Qual Res J*. 2012;12(6):630–644.



- 1  
2  
3 (34) Berger R. Now I see it, now I don't: researcher's position and reflexivity in  
4 qualitative research. *Qual Res.* 2013;15(2):219–34.  
5  
6  
7  
8 (35) Drake P. Grasping at methodological understanding: a cautionary tale from  
9 insider research. *Int J Res Method Educ.* 2010;33(1):85–99.  
10  
11  
12  
13 (36) Pope C, Ziebland S, Mays N. Analysing qualitative data. *BMJ.*  
14  
15 2000;320(7227):114–6.  
16  
17  
18 (37) Faircloth C. 'Natural' Breastfeeding in Comparative Perspective: Feminism,  
19 Morality, and Adaptive Accountability. *Ethnos.* 2017;82(1):19–43.  
20  
21  
22  
23 (38) Faircloth C. "Culture means nothing to me": Thoughts on nature/culture in  
24 narratives of long-term breastfeeding. *Cambridge Anthropol.* 2008;28(2):63–84.  
25  
26  
27  
28 (39) Bowlby J. *Attachment.* London: Pelican; 1969.  
29  
30  
31 (40) Sears W, Sears M. *The Attachment Parenting Book.* Massachusetts: Little, Brown  
32 and Company; 2001.  
33  
34  
35 (41) Miller PM, Commons M. The benefits of attachment parenting for infants and  
36 children: A behavioural developmental view. *Behav Dev Bull.* 2010;16(1):1-14.  
37  
38  
39  
40 (42) van den Berg M, Ball HL. Practices, advice and support regarding prolonged  
41 breastfeeding: a descriptive study from Sri Lanka. *J Reprod Infant Psychol.*  
42 2008;26(3):229–43.  
43  
44  
45  
46  
47 (43) Hauck FR, Thompson JMD, Tanabe KO, Moon RY, Vennemann MM. Breastfeeding  
48 and Reduced Risk of Sudden Infant Death Syndrome: A Meta-analysis. *Pediatrics.*  
49 2011;128(1):103-10.  
50  
51  
52  
53  
54 (44) National Institute of Clinical Excellence (NICE). Addendum to Clinical Guideline  
55 37, Postnatal Care December. 2014.  
56  
57  
58  
59  
60

1  
2  
3 [https://www.nice.org.uk/guidance/cg37/evidence/cg37-postnatal-care-full-](https://www.nice.org.uk/guidance/cg37/evidence/cg37-postnatal-care-full-guideline-addendum2)  
4 [guideline-addendum2](https://www.nice.org.uk/guidance/cg37/evidence/cg37-postnatal-care-full-guideline-addendum2). Accessed 9 Sept 2019.  
5  
6  
7

- 8 (45) Dettwyler KA. A Time to Wean: The Hominid Blueprint for the Natural Age of  
9 Weaning in Modern Human Populations. In Stuart-Macadam P, Dettwyler KA.  
10 Breastfeeding: Biocultural Perspectives. New York: Aldine de Gruyter; 1995. p.  
11 39-73.  
12  
13  
14  
15  
16  
17  
18 (46) Dettwyler KA. When to Wean: Biological Versus Cultural Perspectives. Clin Obstet  
19 Gynecol. 2004;47(3).  
20  
21  
22  
23  
24  
25  
26  
27  
28  
29  
30  
31  
32  
33  
34  
35  
36  
37  
38  
39  
40  
41  
42  
43  
44  
45  
46  
47  
48  
49  
50  
51  
52  
53  
54  
55  
56  
57  
58  
59  
60

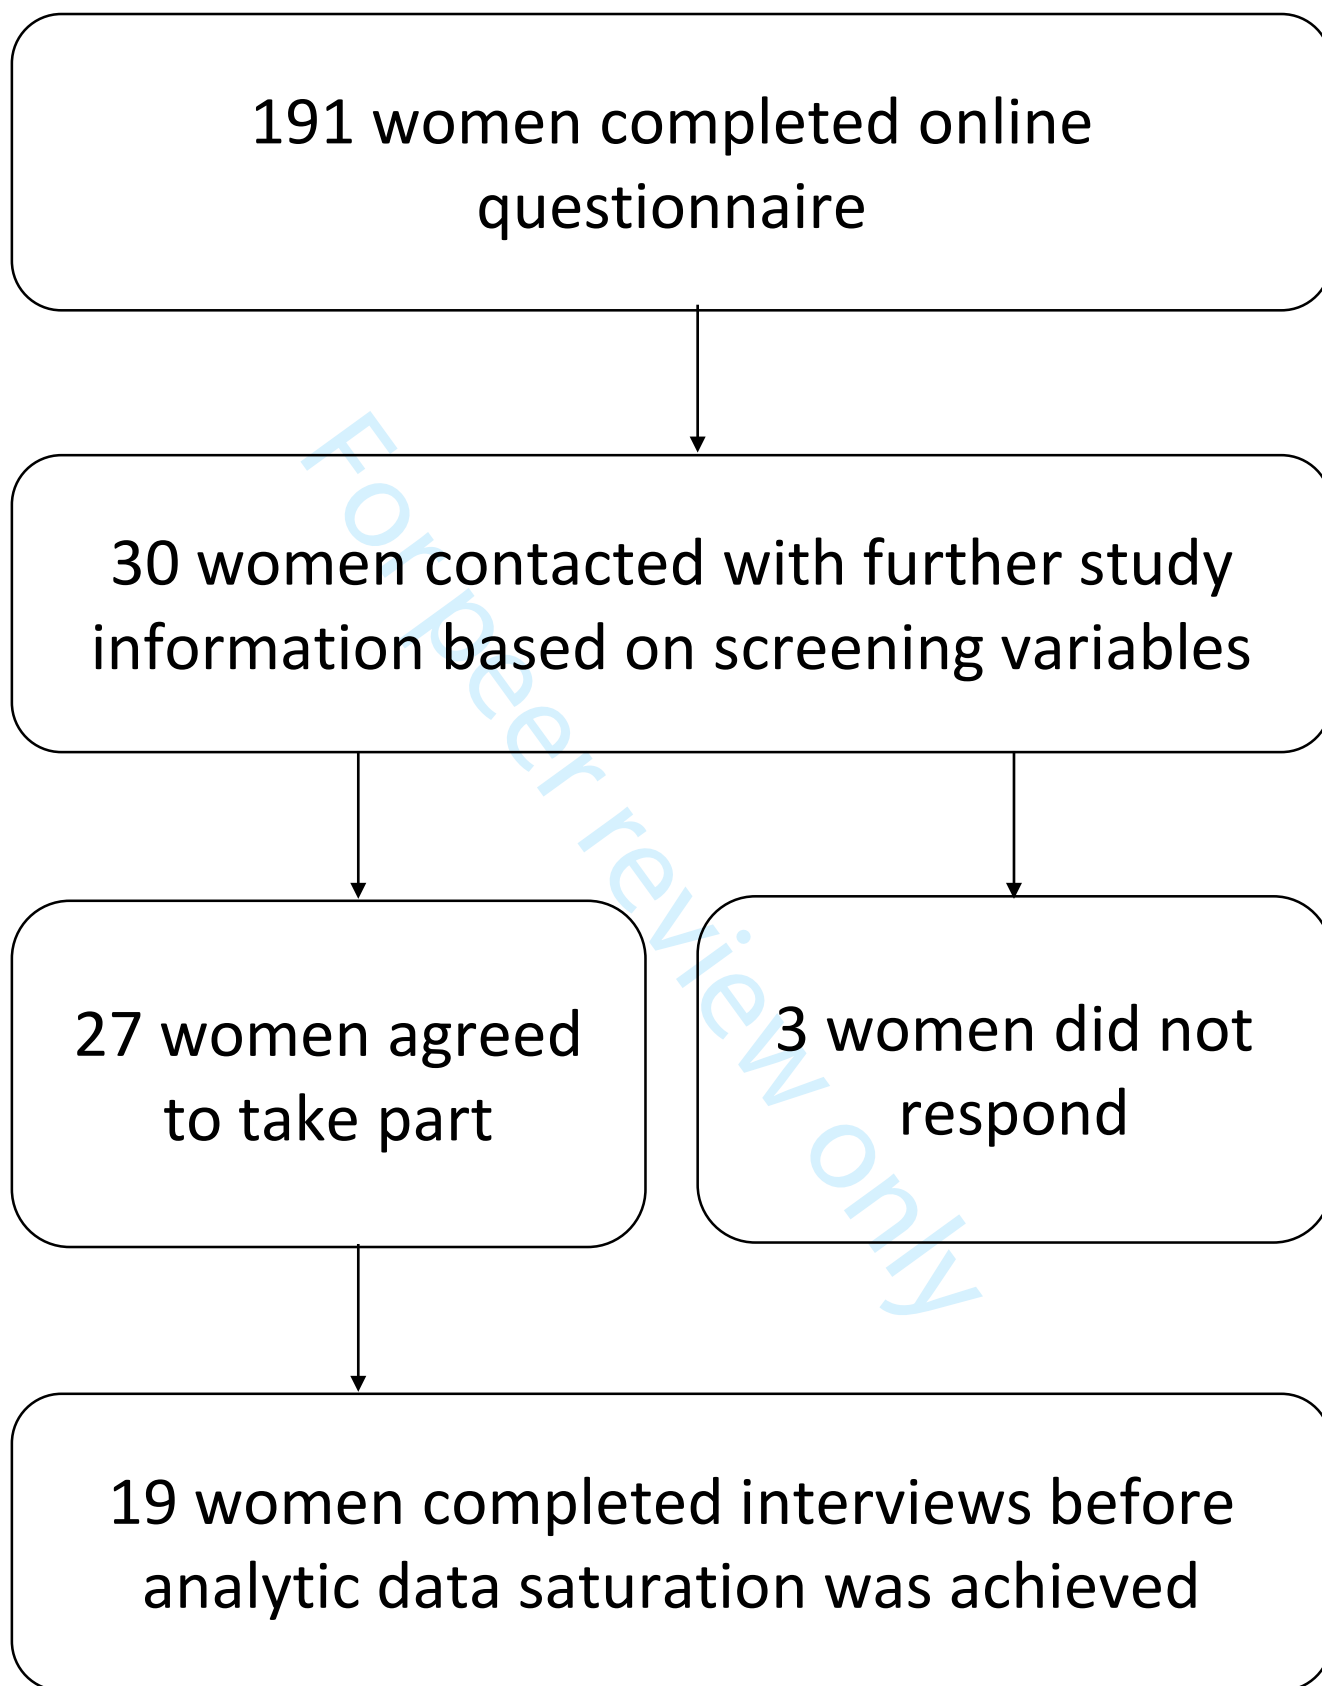

# Parenting philosophy

- Attachment parenting paradigm
- Child-led approach

- Benefits of breastfeeding
- Biological norm
- Sense of achievement
- Supporting others

# Breastfeeding beliefs

# Transition from babyhood to toddlerhood

- Adjusting expectations
  - Managing perceived disapproval
  - Breastfeeding as a parenting tool
- Self-protection strategies
  - Importance of peer support

1  
2  
3  
4  
5  
6  
7  
8  
9  
10  
11  
12  
13  
14  
15  
16  
17  
18  
19  
20  
21  
22  
23  
24  
25  
26  
27  
28

## ADDITIONAL FILE 1

**Consolidated criteria for reporting qualitative studies (COREQ): 32-item checklist**

Developed from:

Tong A, Sainsbury P, Craig J. Consolidated criteria for reporting qualitative research (COREQ): a 32-item checklist for interviews and focus groups. *Int J Qual Health C.* 2007; 19(6): 349–357.<http://dx.doi.org/10.1093/intqhc/mzm042>

| Topic                                      | Item No. | Guide Questions/Description                                                                                                                            | Reported on Page No. |
|--------------------------------------------|----------|--------------------------------------------------------------------------------------------------------------------------------------------------------|----------------------|
| <b>Domain 1: Research team reflexivity</b> |          |                                                                                                                                                        |                      |
| <i>Personal characteristics</i>            |          |                                                                                                                                                        |                      |
| Interviewer/facilitator                    | 1        | Which author/s conducted the interview or focus group?                                                                                                 | 8                    |
| Credentials                                | 2        | What were the researcher's credentials?                                                                                                                | 8                    |
| Occupation                                 | 3        | What was their occupation at the time of the study?                                                                                                    | 8                    |
| Gender                                     | 4        | Was the researcher male or female?                                                                                                                     | 8                    |
| Experience and training                    | 5        | What experience or training did the researcher have?                                                                                                   | 8                    |
| <i>Relationship with participants</i>      |          |                                                                                                                                                        |                      |
| Relationship established                   | 6        | Was a relationship established prior to study commencement?                                                                                            | 23                   |
| Participant knowledge of the interviewer   | 7        | What did the participants know about the researcher? E.g. personal goals, reasons for doing the research                                               | 24                   |
| Interviewer characteristics                | 8        | What characteristics were reported about the interviewer? E.g. bias, assumptions, reasons and interests in the research topic                          | 8, 24                |
| <b>Domain 2: Study design</b>              |          |                                                                                                                                                        |                      |
| <i>Theoretical framework</i>               |          |                                                                                                                                                        |                      |
| Methodological orientation and Theory      | 9        | What methodological orientation was used to underpin the study? E.g. grounded theory, discourse analysis, ethnography, phenomenology, content analysis | 7                    |
| <i>Participant selection</i>               |          |                                                                                                                                                        |                      |
| Sampling                                   | 10       | How were participants selected? E.g. purposive, convenience, consecutive, snowball                                                                     | 8                    |
| Method of approach                         | 11       | How were participants approached? E.g. face-to-face, telephone, mail, email                                                                            | 8                    |
| Sample size                                | 12       | How many participants were in the study?                                                                                                               | 8                    |
| Non-participation                          | 13       | How many people refused to participate or dropped out? Reasons?                                                                                        | 8                    |

| <i>Setting</i>                         |    |                                                                                                                                 |              |
|----------------------------------------|----|---------------------------------------------------------------------------------------------------------------------------------|--------------|
| Setting of data collection             | 14 | Where was the data collected? E.g. home, clinic, workplace                                                                      | 8,9          |
| Presence of non-participants           | 15 | Was anyone else present besides the participants and researchers?                                                               | 9            |
| Description of sample                  | 16 | What are the important characteristics of the sample? E.g. demographic data                                                     | 11 (table 3) |
| <i>Data collection</i>                 |    |                                                                                                                                 |              |
| Interview guide                        | 17 | Were questions, prompts, guides provided by the authors? Was it pilot tested?                                                   | 9 (table 1)  |
| Repeat interviews                      | 18 | Were repeat interviews carried out? If yes, how many?                                                                           | N/A          |
| Audio/visual recording                 | 19 | Did the research use audio or visual recording to collect the data?                                                             | 9            |
| Field notes                            | 20 | Were field notes made during and/or after the interview or focus group?                                                         | 9            |
| Duration                               | 21 | What was the duration of the interviews or focus group?                                                                         | 8            |
| Data saturation                        | 22 | Was data saturation discussed?                                                                                                  | 8            |
| Transcripts returned                   | 23 | Were transcripts returned to participants for comment and/or correction?                                                        | N/A          |
| <b>Domain 3: analysis and findings</b> |    |                                                                                                                                 |              |
| <i>Data analysis</i>                   |    |                                                                                                                                 |              |
| Number of data coders                  | 24 | How many data coders coded the data?                                                                                            | 9            |
| Description of the coding tree         | 25 | Did authors provide a description of the coding tree?                                                                           | N/A          |
| Derivation of themes                   | 26 | Were themes identified in advance or derived from the data?                                                                     | 7            |
| Software                               | 27 | What software, if applicable, was used to manage the data?                                                                      | 9            |
| Participant checking                   | 28 | Did participants provide feedback on the findings?                                                                              | N/A          |
| <i>Reporting</i>                       |    |                                                                                                                                 |              |
| Quotations presented                   | 29 | Were participant quotations presented to illustrate the themes/findings? Was each quotation identified? E.g. participant number | 12-22        |
| Data and findings consistent           | 30 | Was there consistency between the data presented and the findings?                                                              | 12-22        |
| Clarity of major themes                | 31 | Were major themes clearly presented in the findings?                                                                            | 12-22        |
| Clarity of minor themes                | 32 | Is there a description of diverse cases or discussion of minor themes?                                                          | 12-22        |

1  
2  
3  
4  
5  
6  
7  
8  
9  
10  
11  
12  
13  
14  
15  
16  
17  
18  
19  
20  
21  
22  
23  
24  
25  
26  
27  
28  
29  
30  
31  
32  
33  
34  
35  
36  
37  
38  
39  
40  
41  
42  
43  
44  
45  
46

ADDITIONAL FILE 2 – Supplementary Quotes Table

| Theme                        | Sub-Theme                     | Quote                                                                                                                                                                                                                                                                                                                                                                                                                                                                                                                                                                                                                                                        | Participant |
|------------------------------|-------------------------------|--------------------------------------------------------------------------------------------------------------------------------------------------------------------------------------------------------------------------------------------------------------------------------------------------------------------------------------------------------------------------------------------------------------------------------------------------------------------------------------------------------------------------------------------------------------------------------------------------------------------------------------------------------------|-------------|
| <b>Parenting Philosophy</b>  | Attachment parenting paradigm | “My daughter was very demanding and quite communicative even as a newborn...She told us what she wanted and what she wanted was for us to be attachment parents, basically. That was not something I went into parenting thinking. I had no particular opinions on co-sleeping or anything else, really. It’s just she slept better in bed with us so she slept in bed with us. She wanted to be on the breast so I put her on the breast. She didn’t like the buggy, so I had her in a sling. I would find it hard to imagine that somebody who did extended breastfeeding never ever coslept or never baby carried, but it’s entirely possible I suppose.” | 16          |
|                              |                               | “I intended to follow the attachment parenting route, so I’ve kind of done that, but I have made different decisions along the way, or not made decisions and let him lead it more than I thought I would have done.”                                                                                                                                                                                                                                                                                                                                                                                                                                        | 9           |
|                              |                               | “When we were running around in caves we didn’t put our babies in cots in the next room, our babies were next to us because that’s where they feel safe.”                                                                                                                                                                                                                                                                                                                                                                                                                                                                                                    | 6           |
|                              | Child-led approach            | “We’ve carried on because it seems to be important to him.”                                                                                                                                                                                                                                                                                                                                                                                                                                                                                                                                                                                                  | 10          |
|                              |                               | “If she wants to carry on I’m not going to cause her anxiety and stress by saying ‘oh no you can’t do that’. Obviously, I do every now and then, I have to distract her but I’m not going to wean her intentionally when that’s what she wants.”                                                                                                                                                                                                                                                                                                                                                                                                             | 12          |
|                              |                               | “It also didn’t sit well with me emotionally, to force her into these things that didn’t seem right for her. Her one comfort was breastfeeding. That was the thing that worked for her.”                                                                                                                                                                                                                                                                                                                                                                                                                                                                     | 16          |
|                              |                               | “I have no intention of stopping until he wants to stop.”                                                                                                                                                                                                                                                                                                                                                                                                                                                                                                                                                                                                    | 2           |
| <b>Breastfeeding Beliefs</b> | Benefits of breastfeeding     | “Anything that he needs at that moment, my milk is going to change to his needs. And if I get a cold, the antibodies will get passed through to him.”                                                                                                                                                                                                                                                                                                                                                                                                                                                                                                        | 18          |
|                              |                               | “The main one in our house at the moment is the immunity because we have had continuous bugs in our house since the smallest one has been born, so I wonder where we would be if we didn’t have that. And I know that that doesn’t dissipate no matter what the age of the child, so I don’t want to give that up.”                                                                                                                                                                                                                                                                                                                                          | 10          |

|  |                      |                                                                                                                                                                                                                                                                                                                                                                                                                                                                                                                                                                 |    |
|--|----------------------|-----------------------------------------------------------------------------------------------------------------------------------------------------------------------------------------------------------------------------------------------------------------------------------------------------------------------------------------------------------------------------------------------------------------------------------------------------------------------------------------------------------------------------------------------------------------|----|
|  |                      | “When my child is sick, that’s the best time. That’s the best reassurance of knowing that I’m doing the best thing for him. Because he won’t eat anything else, not keeping anything else down, or if he’s lethargic, you know that they’re getting their vitamins and that’s the best feeling in the world.”                                                                                                                                                                                                                                                   | 14 |
|  |                      | “Some days my mum will say I offered her this but she didn’t have that, she did have a bit of cake or banana or yogurt, so sometimes nothing savory, but I know that at least at the start and the end of the day she’s getting that goodness from me. That’s a real plus point for still feeding.”                                                                                                                                                                                                                                                             | 19 |
|  |                      | “For me it wasn’t really about nutrition, although certainly there are nutritional benefits, but it was more about health benefits, bonding, the parenting tool which you can’t get from cow’s milk because it’s not the same thing.”                                                                                                                                                                                                                                                                                                                           | 15 |
|  | Biological norm      | “Just that it is biologically normal. That’s the main reason for feeding. We are mammals, and mammals are designed to feed their children. Evolution would tell you that that’s what is best for them.”                                                                                                                                                                                                                                                                                                                                                         | 1  |
|  |                      | “And the more I learned about how babies are, and about the breastfeeding dyad, and breastfeeding from an evolutionary perspective, baby brain and physical development, it just really made me realise the importance of breastfeeding as opposed to other feeding methods.”                                                                                                                                                                                                                                                                                   | 5  |
|  |                      | “I never thought this would be something I’d do, but when I looked into the fact that it is biologically normally, I decided to, why not? And it’s worked out for us.”                                                                                                                                                                                                                                                                                                                                                                                          | 15 |
|  | Sense of achievement | “My choice is to breastfeed my baby. Every other choice about my birth had been taken away from me – and that’s okay because we came out of it alive and that’s the main thing – but I was so determined not to lose this...For me, it’s this amazing achievement”                                                                                                                                                                                                                                                                                              | 11 |
|  |                      | “I feel lucky that I was able to breastfeed because I had a very difficult birth and my birth was not how I wanted it to be. For me, being able to breastfeed has been a gift to my child. And for me breastfeeding has been healing. I didn’t give birth in the way that I wanted to so being able to breastfeed has been a gift. It will be one of my greatest achievements and one of the greatest gifts that I could give to my son in lots of ways; health, emotionally... that’s why I want it to end well. I want it to be something that is beautiful.” | 9  |



|    |                                                |                                                                                                                                                                                                                                                                                                                                                                                                                                        |                                                                                                                                                                                                                                                                                                                                                                                                                          |    |
|----|------------------------------------------------|----------------------------------------------------------------------------------------------------------------------------------------------------------------------------------------------------------------------------------------------------------------------------------------------------------------------------------------------------------------------------------------------------------------------------------------|--------------------------------------------------------------------------------------------------------------------------------------------------------------------------------------------------------------------------------------------------------------------------------------------------------------------------------------------------------------------------------------------------------------------------|----|
| 1  |                                                |                                                                                                                                                                                                                                                                                                                                                                                                                                        |                                                                                                                                                                                                                                                                                                                                                                                                                          |    |
| 2  |                                                |                                                                                                                                                                                                                                                                                                                                                                                                                                        |                                                                                                                                                                                                                                                                                                                                                                                                                          |    |
| 3  |                                                |                                                                                                                                                                                                                                                                                                                                                                                                                                        |                                                                                                                                                                                                                                                                                                                                                                                                                          |    |
| 4  | Supporting others                              | "I needed breastfeeding counsellors coming to home to show me things. It's all very well saying oh well go out to a group, but at first it took me 10 days to leave the house and even them I was like oh my god, what am I doing? I want people coming to my house to help me and reassure that it's okay. Because we've lost all that. We've lost seeing other people feed. I think there should be way more support than there is." | 13                                                                                                                                                                                                                                                                                                                                                                                                                       |    |
| 5  |                                                |                                                                                                                                                                                                                                                                                                                                                                                                                                        |                                                                                                                                                                                                                                                                                                                                                                                                                          |    |
| 6  |                                                |                                                                                                                                                                                                                                                                                                                                                                                                                                        |                                                                                                                                                                                                                                                                                                                                                                                                                          |    |
| 7  |                                                |                                                                                                                                                                                                                                                                                                                                                                                                                                        |                                                                                                                                                                                                                                                                                                                                                                                                                          |    |
| 8  |                                                |                                                                                                                                                                                                                                                                                                                                                                                                                                        |                                                                                                                                                                                                                                                                                                                                                                                                                          |    |
| 9  |                                                |                                                                                                                                                                                                                                                                                                                                                                                                                                        |                                                                                                                                                                                                                                                                                                                                                                                                                          |    |
| 10 |                                                | "I think the more help there is to enable people to breastfeed then the better it will be. Which is why I do what I do and spend so much time helping mums, giving advice, approving posts, become a peer support worker, because when I started I didn't even know I could go to a breastfeeding group, which I think would've really helped me and I might have made more friends with mums that are actually still breastfeeding"   | 14                                                                                                                                                                                                                                                                                                                                                                                                                       |    |
| 11 |                                                |                                                                                                                                                                                                                                                                                                                                                                                                                                        |                                                                                                                                                                                                                                                                                                                                                                                                                          |    |
| 12 |                                                |                                                                                                                                                                                                                                                                                                                                                                                                                                        |                                                                                                                                                                                                                                                                                                                                                                                                                          |    |
| 13 |                                                |                                                                                                                                                                                                                                                                                                                                                                                                                                        |                                                                                                                                                                                                                                                                                                                                                                                                                          |    |
| 14 |                                                |                                                                                                                                                                                                                                                                                                                                                                                                                                        |                                                                                                                                                                                                                                                                                                                                                                                                                          |    |
| 15 |                                                |                                                                                                                                                                                                                                                                                                                                                                                                                                        |                                                                                                                                                                                                                                                                                                                                                                                                                          |    |
| 16 |                                                | "It just made me really want to support people, breastfeeding made me feel good so I just want to see more support for other women."                                                                                                                                                                                                                                                                                                   | 5                                                                                                                                                                                                                                                                                                                                                                                                                        |    |
| 17 |                                                |                                                                                                                                                                                                                                                                                                                                                                                                                                        |                                                                                                                                                                                                                                                                                                                                                                                                                          |    |
| 18 | <b>Transition from Babyhood to Toddlerhood</b> | Adjusting expectations                                                                                                                                                                                                                                                                                                                                                                                                                 | "I thought he would wean when we started solids, and then I thought he would wean when I went back to work – convinced he was going to wean when I went back to work because I was doing night shifts. Then I was convinced he would wean when he started walking, because that was delayed. Then – when was the next time? – when I got pregnant. But he didn't, and then I gave up thinking he would wean after that." | 10 |
| 19 |                                                |                                                                                                                                                                                                                                                                                                                                                                                                                                        |                                                                                                                                                                                                                                                                                                                                                                                                                          |    |
| 20 |                                                |                                                                                                                                                                                                                                                                                                                                                                                                                                        |                                                                                                                                                                                                                                                                                                                                                                                                                          |    |
| 21 |                                                |                                                                                                                                                                                                                                                                                                                                                                                                                                        |                                                                                                                                                                                                                                                                                                                                                                                                                          |    |
| 22 |                                                |                                                                                                                                                                                                                                                                                                                                                                                                                                        |                                                                                                                                                                                                                                                                                                                                                                                                                          |    |
| 23 |                                                |                                                                                                                                                                                                                                                                                                                                                                                                                                        |                                                                                                                                                                                                                                                                                                                                                                                                                          |    |
| 24 |                                                |                                                                                                                                                                                                                                                                                                                                                                                                                                        |                                                                                                                                                                                                                                                                                                                                                                                                                          |    |
| 25 |                                                |                                                                                                                                                                                                                                                                                                                                                                                                                                        |                                                                                                                                                                                                                                                                                                                                                                                                                          |    |
| 26 |                                                |                                                                                                                                                                                                                                                                                                                                                                                                                                        |                                                                                                                                                                                                                                                                                                                                                                                                                          |    |
| 27 |                                                | "It's good to see that people are going for longer and feeding for longer, because I didn't presume it happened to be honest. You never really see it so I didn't know the time that you're supposed to breastfeed for."                                                                                                                                                                                                               | 12                                                                                                                                                                                                                                                                                                                                                                                                                       |    |
| 28 |                                                |                                                                                                                                                                                                                                                                                                                                                                                                                                        |                                                                                                                                                                                                                                                                                                                                                                                                                          |    |
| 29 |                                                | "I wanted to manage 6 weeks because I thought that was what people did, and then babies have bottles. The same way that babies wear nappies, babies have bottles."                                                                                                                                                                                                                                                                     | 4                                                                                                                                                                                                                                                                                                                                                                                                                        |    |
| 30 |                                                |                                                                                                                                                                                                                                                                                                                                                                                                                                        |                                                                                                                                                                                                                                                                                                                                                                                                                          |    |
| 31 |                                                | Managing perceived disapproval                                                                                                                                                                                                                                                                                                                                                                                                         | "It seems like past a year, then people are like 'what are you doing? They can have cow's milk. Why would you bother?'"                                                                                                                                                                                                                                                                                                  | 10 |
| 32 |                                                |                                                                                                                                                                                                                                                                                                                                                                                                                                        |                                                                                                                                                                                                                                                                                                                                                                                                                          |    |
| 33 |                                                |                                                                                                                                                                                                                                                                                                                                                                                                                                        |                                                                                                                                                                                                                                                                                                                                                                                                                          |    |
| 34 |                                                |                                                                                                                                                                                                                                                                                                                                                                                                                                        |                                                                                                                                                                                                                                                                                                                                                                                                                          |    |
| 35 |                                                | "There are so many people that would say that it's weird and what are you doing. And 'why hasn't he weaned, is there something wrong?'"                                                                                                                                                                                                                                                                                                | 11                                                                                                                                                                                                                                                                                                                                                                                                                       |    |
| 36 |                                                |                                                                                                                                                                                                                                                                                                                                                                                                                                        |                                                                                                                                                                                                                                                                                                                                                                                                                          |    |
| 37 |                                                |                                                                                                                                                                                                                                                                                                                                                                                                                                        |                                                                                                                                                                                                                                                                                                                                                                                                                          |    |
| 38 |                                                | "I didn't want to feed in public. And when she was around 2 and having these tantrums I knew that breastfeeding would calm her down but I didn't want to do it and I was very self-conscious of that and I would get more stressed and she would get stressed."                                                                                                                                                                        | 16                                                                                                                                                                                                                                                                                                                                                                                                                       |    |
| 39 |                                                |                                                                                                                                                                                                                                                                                                                                                                                                                                        |                                                                                                                                                                                                                                                                                                                                                                                                                          |    |
| 40 |                                                |                                                                                                                                                                                                                                                                                                                                                                                                                                        |                                                                                                                                                                                                                                                                                                                                                                                                                          |    |
| 41 |                                                |                                                                                                                                                                                                                                                                                                                                                                                                                                        |                                                                                                                                                                                                                                                                                                                                                                                                                          |    |
| 42 |                                                |                                                                                                                                                                                                                                                                                                                                                                                                                                        |                                                                                                                                                                                                                                                                                                                                                                                                                          |    |
| 43 |                                                |                                                                                                                                                                                                                                                                                                                                                                                                                                        |                                                                                                                                                                                                                                                                                                                                                                                                                          |    |
| 44 |                                                |                                                                                                                                                                                                                                                                                                                                                                                                                                        |                                                                                                                                                                                                                                                                                                                                                                                                                          |    |
| 45 |                                                |                                                                                                                                                                                                                                                                                                                                                                                                                                        |                                                                                                                                                                                                                                                                                                                                                                                                                          |    |
| 46 |                                                |                                                                                                                                                                                                                                                                                                                                                                                                                                        |                                                                                                                                                                                                                                                                                                                                                                                                                          |    |

|  |                                   |                                                                                                                                                                                                                                                                                                                                                                                                                                                             |    |
|--|-----------------------------------|-------------------------------------------------------------------------------------------------------------------------------------------------------------------------------------------------------------------------------------------------------------------------------------------------------------------------------------------------------------------------------------------------------------------------------------------------------------|----|
|  | <i>Self-protection strategies</i> | "But the toddler, I don't do it [breastfeed] out in public. I annoy myself by not doing it out in public, because you don't see people doing it out in public, so it's not normalised, and I'm perpetuating this."                                                                                                                                                                                                                                          | 4  |
|  |                                   | "I find myself using really apologetic language about it. And I have to sort of justify it."                                                                                                                                                                                                                                                                                                                                                                | 19 |
|  |                                   | "I think once we got to the age of 1... you start to feel like you need to have the science to back it up."                                                                                                                                                                                                                                                                                                                                                 | 1  |
|  | <i>Accessing support</i>          | "There was a breastfeeding class, not a class, a support group... But when my daughter got to a year old I realised that she was the oldest baby there, and people have given up a long time before. So I realised I was a bit of an outlier in terms of the duration but I am involved in a lot of breastfeeding groups on Facebook. I think you need that support."                                                                                       | 12 |
|  |                                   | "Having a network and a group of other women who have gone through it, peer supporters and that, that's a really important factor. Finding that group of people that share your views on breastfeeding. Without that, it would be a fairly lonely experience. I've made friends through breastfeeding that I still meet up with now."                                                                                                                       | 6  |
|  |                                   | "I hear from a lot of mums that they are being told to stop night feeds by the health visitors and I think there's a lot of opinion rather than evidence-based information out there. I see it as a big factor."                                                                                                                                                                                                                                            | 5  |
|  | Breastfeeding as a parenting tool | "If he's scared, that's the first place he goes and he calms down like that. If he's upset, he'll have literally 20 seconds if that – it's the best parenting tool I've ever had."                                                                                                                                                                                                                                                                          | 2  |
|  |                                   | "To cure all problems – whether she's warm or whether she's cold or whether she's thirsty or whether she's just feeling a bit insecure or just needs a cuddle, you know that there's one thing that fixes everything. Rather than having to do a checklist of saying well check her temperature, change the outfit, put her in the bath, or whatever, and having to go through the checklist and wonder what could possibly be wrong, it fixes everything." | 12 |
|  |                                   | "It certainly makes life with a toddler so much easier if they fall down and scrape their knee or are scared about a situation or something it was so easy to have them nurse for a few seconds and then they're back to being happy"                                                                                                                                                                                                                       | 7  |
