# Supplementary material for: ‘Surely you’re not still breastfeeding’: a qualitative exploration of women’s experiences of breastfeeding beyond infancy in the UK
Source: PubMed Central journal article supplement — BMJ Open. 2020 May 26;10(5):e035199. doi: 10.1136/bmjopen-2019-035199 (PMC7259861; doi:10.1136/bmjopen-2019-035199), 2020-05-26
Supplement: bmjopen-2019-035199supp001.pdf [file bmjopen-2019-035199supp001.pdf]

## ADDITIONAL FILE 1

**Consolidated criteria for reporting qualitative studies (COREQ): 32-item checklist**

Developed from:

Tong A, Sainsbury P, Craig J. Consolidated criteria for reporting qualitative research (COREQ): a 32-item checklist for interviews and focus groups. *Int J Qual Health C.* 2007; 19(6): 349–357.<http://dx.doi.org/10.1093/intqhc/mzm042>

| Topic                                      | Item No. | Guide Questions/Description                                                                                                                            | Reported on Page No. |
|--------------------------------------------|----------|--------------------------------------------------------------------------------------------------------------------------------------------------------|----------------------|
| <b>Domain 1: Research team reflexivity</b> |          |                                                                                                                                                        |                      |
| <i>Personal characteristics</i>            |          |                                                                                                                                                        |                      |
| Interviewer/facilitator                    | 1        | Which author/s conducted the interview or focus group?                                                                                                 | 8                    |
| Credentials                                | 2        | What were the researcher's credentials?                                                                                                                | 8                    |
| Occupation                                 | 3        | What was their occupation at the time of the study?                                                                                                    | 8                    |
| Gender                                     | 4        | Was the researcher male or female?                                                                                                                     | 8                    |
| Experience and training                    | 5        | What experience or training did the researcher have?                                                                                                   | 8                    |
| <i>Relationship with participants</i>      |          |                                                                                                                                                        |                      |
| Relationship established                   | 6        | Was a relationship established prior to study commencement?                                                                                            | 23                   |
| Participant knowledge of the interviewer   | 7        | What did the participants know about the researcher? E.g. personal goals, reasons for doing the research                                               | 24                   |
| Interviewer characteristics                | 8        | What characteristics were reported about the interviewer? E.g. bias, assumptions, reasons and interests in the research topic                          | 8, 24                |
| <b>Domain 2: Study design</b>              |          |                                                                                                                                                        |                      |
| <i>Theoretical framework</i>               |          |                                                                                                                                                        |                      |
| Methodological orientation and Theory      | 9        | What methodological orientation was used to underpin the study? E.g. grounded theory, discourse analysis, ethnography, phenomenology, content analysis | 7                    |
| <i>Participant selection</i>               |          |                                                                                                                                                        |                      |
| Sampling                                   | 10       | How were participants selected? E.g. purposive, convenience, consecutive, snowball                                                                     | 8                    |
| Method of approach                         | 11       | How were participants approached? E.g. face-to-face, telephone, mail, email                                                                            | 8                    |
| Sample size                                | 12       | How many participants were in the study?                                                                                                               | 8                    |
| Non-participation                          | 13       | How many people refused to participate or dropped out? Reasons?                                                                                        | 8                    |

| <i>Setting</i>                         |    |                                                                                                                                 |              |
|----------------------------------------|----|---------------------------------------------------------------------------------------------------------------------------------|--------------|
| Setting of data collection             | 14 | Where was the data collected? E.g. home, clinic, workplace                                                                      | 8,9          |
| Presence of non-participants           | 15 | Was anyone else present besides the participants and researchers?                                                               | 9            |
| Description of sample                  | 16 | What are the important characteristics of the sample? E.g. demographic data                                                     | 11 (table 3) |
| <i>Data collection</i>                 |    |                                                                                                                                 |              |
| Interview guide                        | 17 | Were questions, prompts, guides provided by the authors? Was it pilot tested?                                                   | 9 (table 1)  |
| Repeat interviews                      | 18 | Were repeat interviews carried out? If yes, how many?                                                                           | N/A          |
| Audio/visual recording                 | 19 | Did the research use audio or visual recording to collect the data?                                                             | 9            |
| Field notes                            | 20 | Were field notes made during and/or after the interview or focus group?                                                         | 9            |
| Duration                               | 21 | What was the duration of the interviews or focus group?                                                                         | 8            |
| Data saturation                        | 22 | Was data saturation discussed?                                                                                                  | 8            |
| Transcripts returned                   | 23 | Were transcripts returned to participants for comment and/or correction?                                                        | N/A          |
| <b>Domain 3: analysis and findings</b> |    |                                                                                                                                 |              |
| <i>Data analysis</i>                   |    |                                                                                                                                 |              |
| Number of data coders                  | 24 | How many data coders coded the data?                                                                                            | 9            |
| Description of the coding tree         | 25 | Did authors provide a description of the coding tree?                                                                           | N/A          |
| Derivation of themes                   | 26 | Were themes identified in advance or derived from the data?                                                                     | 7            |
| Software                               | 27 | What software, if applicable, was used to manage the data?                                                                      | 9            |
| Participant checking                   | 28 | Did participants provide feedback on the findings?                                                                              | N/A          |
| <i>Reporting</i>                       |    |                                                                                                                                 |              |
| Quotations presented                   | 29 | Were participant quotations presented to illustrate the themes/findings? Was each quotation identified? E.g. participant number | 12-22        |
| Data and findings consistent           | 30 | Was there consistency between the data presented and the findings?                                                              | 12-22        |
| Clarity of major themes                | 31 | Were major themes clearly presented in the findings?                                                                            | 12-22        |
| Clarity of minor themes                | 32 | Is there a description of diverse cases or discussion of minor themes?                                                          | 12-22        |
